# Supplementary material
Source: publisher figshare collection journal article supplement (https://acs.figshare.com/ndownloader/files/8336621)
Supplement: Supplementary file 1 [file 8336621]

**Supporting Information:** Synergistic Effects of an Irreversible DNA Polymerase Inhibitor and  
DNA Damaging Agents on HeLa Cells

Rakesh Paul, Samya Banerjee, and Marc M. Greenberg\*

Department of Chemistry, Johns Hopkins University, 3400 N. Charles St., Baltimore, MD 21218

\*Corresponding author: Marc M. Greenberg

**Contents:**

1. General Methods (S2 – S13)
2. **Chart S1.** Carboxylic acids used to prepare inhibitor candidates. (S14 - S16)
3. **Scheme S1.** Fluorescence screen for inhibitors. (S17)
4. **Figure S1.** Detection of DNA damage in HeLa cells treated with bleomycin. (S18)
5. **Figure S2.** Effect of **13** on Ape1 activity. (S18)
6. **Figure S3.** Demonstration that ARP reacts with dRP in **15**. (S19)
7. **Chart S2.** Inhibitor candidates identified from fluorescence screen. (S19)
8. **Figure S4.** Concentration dependence of effect of **13** on strand displacement synthesis in **14** by Pol  $\beta$  measured via fluorescence. (S20)
9. **Figure S5.** HeLa cell cytotoxicity following treatment with MMS and/or pro-**1** (5  $\mu$ M) for 2 h. (S17)
10. **Figure S6.**  $^1\text{H}$  and  $^{13}\text{C}$  NMR spectra of **5**. (S21)
11. **Figure S7.**  $^1\text{H}$  and  $^{31}\text{P}$  NMR spectra of **11**. (S22)
12. **Figure S8.**  $^1\text{H}$  and  $^{13}\text{C}$  NMR spectra of **9**. (S23)
13. **Figure S9.**  $^1\text{H}$  and  $^{13}\text{C}$  NMR spectra of **6**. (S24)
14. **Figure S10.**  $^1\text{H}$  and  $^{13}\text{C}$  NMR spectra of **7**. (S25)
15. **Figure S11.**  $^1\text{H}$  and  $^{31}\text{P}$  NMR spectra of TBS-phosphate triester precursor to **12**. (S26)
16. **Figure S12.**  $^1\text{H}$  and  $^{31}\text{P}$  NMR spectra of **12**. (S27)
17. **Figure S13.**  $^1\text{H}$  and  $^{31}\text{P}$  NMR spectra of pro-**13**. (S28)
18. **Figure S14.**  $^1\text{H}$  and  $^{31}\text{P}$  NMR spectra of **13**. (S29)
19. References. (S30)

**Preparation of DMT-azide 5.** Phthalimide **4<sup>I</sup>** (0.6 g, 0.87 mmol) was azotropically dried (3 × 3

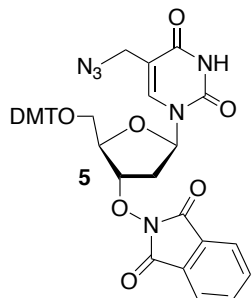

**Preparation of TBS-Aldehyde 9.** *N,N*-Dimethylaminopyridine (25 mg, 0.2 mmol) followed by TBSCl (101 mg, 0.67 mmol) were added to a solution of **8**<sup>2</sup> (115 mg, 0.53 mmol) in dry CH<sub>2</sub>Cl<sub>2</sub> (3 mL) containing triethylamine (0.5 mL, 0.36 g, 3.59

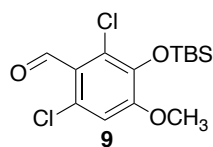

**Preparation of TBS-Aldehyde 9.** *N,N*-Dimethylaminopyridine (25 mg, 0.2 mmol) followed by TBSCl (101 mg, 0.67 mmol) were added to a solution of

**8**<sup>2</sup> (115 mg, 0.53 mmol) in dry CH<sub>2</sub>Cl<sub>2</sub> (3 mL) containing triethylamine (0.5 mL, 0.36 g, 3.59

mmol) at 0 °C and the mixture was stirred at room temperature overnight. The reaction was diluted with CH<sub>2</sub>Cl<sub>2</sub> (30 mL), washed with sat. aq. NH<sub>4</sub>Cl solution (20 mL), brine (20 mL), dried over Na<sub>2</sub>SO<sub>4</sub>, and concentrated under reduced pressure. The residue was purified by flash column chromatography on a silica gel column (15 × 2 cm). Elution with 1:9 → 1:4 ethyl acetate–hexane gave **9** (162 mg, 91%) as a colorless foam. Silica gel TLC *R<sub>f</sub>* = 0.64 (1:9 ethyl acetate–hexane); <sup>1</sup>H NMR (CDCl<sub>3</sub>) δ 10.40 (s, 1H), 6.84 (s, 1H), 3.88 (s, 3H), 1.16 – 0.92 (m, 9H), 0.19 (s, 6H); <sup>13</sup>C NMR (CDCl<sub>3</sub>) δ 188.6, 154.8, 141.7, 130.1, 129.0, 123.2, 112.3, 55.9, 25.9, 19.0, -3.8; HRMS (EI-magnetic sector instrument) C<sub>14</sub>H<sub>21</sub>N<sub>3</sub>O<sub>3</sub>Cl<sub>2</sub>Si (M + H)<sup>+</sup> calcd. *m/z* 335.0637, found 335.0639.

**Preparation of DMT-TBS-Oxime 6.** An aq. solution (8%) of methylamine (0.5 mL) was added

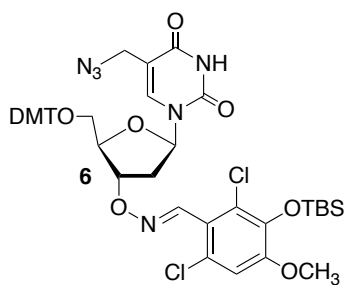

to a solution of **5** (300 mg, 0.41 mmol) in THF (6 mL) and the resulting solution was stirred at room temperature for 2 h. The reaction mixture was concentrated and the residue was coevapoarted with MeOH (3 × 5 mL). The residue was suspended in MeOH (2.4

mL) and a solution of **9** (150 mg, 0.45 mmol) in THF (0.6 mL) was added, followed by AcOH (~ 25 μL). The reaction mixture was stirred at room temperature overnight and concentrated. The residue was purified by flash column chromatography on a silica gel column (25 × 2 cm). Elution with 1:3 → 1:2 ethyl acetate–hexane gave **6** (296 mg, 78%) as a colorless foam. Silica gel TLC *R<sub>f</sub>* = 0.87 (1:10:10 methanol–ethyl acetate–hexane); <sup>1</sup>H NMR (CDCl<sub>3</sub>) δ 9.71 (d, *J* = 16.1 Hz, 1H), 8.30 (s, 1H), 7.92 (d, *J* = 4.7 Hz, 1H), 7.46 – 7.37 (m, 2H), 7.35 – 7.25 (m, 7H), 6.92 – 6.82 (m, 5H), 6.53 (dt, *J* = 14.2, 7.1 Hz, 1H), 5.15 (d, *J* = 6.4 Hz, 1H), 4.41 (d, *J* = 2.0 Hz, 1H), 3.79 (dd, *J* = 7.5, 4.1 Hz, 9H), 3.62 – 3.41 (m, 3H), 3.27 (t, *J* = 15.6 Hz, 1H), 2.80 (dd, *J* = 13.2, 5.8 Hz, 1H), 2.50 – 2.35 (m, 1H), 1.05 – 1.01 (m, 9H), 0.20 – 0.18 (m, 6H); <sup>13</sup>C NMR (101

MHz, CDCl<sub>3</sub>)  $\delta$  162.7, 158.8, 158.8, 151.8, 150.1, 146.9, 144.2, 141.3, 139.2, 135.3, 135.1, 130.2, 130.1, 128.2, 128.1, 127.3, 126.7, 126.1, 120.9, 113.4, 111.8, 110.0, 87.1, 85.1, 83.7, 83.6, 64.0, 55.6, 55.27, 55.26, 46.5, 38.4, 25.9, 18.9, -4.0; HRMS (ESI-TOF) C<sub>45</sub>H<sub>50</sub>Cl<sub>2</sub>N<sub>6</sub>O<sub>9</sub>SiNa (M + Na)<sup>+</sup> calcd.  $m/z$  939.2683, found 939.2665.

**Preparation of TBS-Oxime 7.** A solution of **6** (392 mg, 0.43 mmol) in 85% aq. AcOH (15 mL)

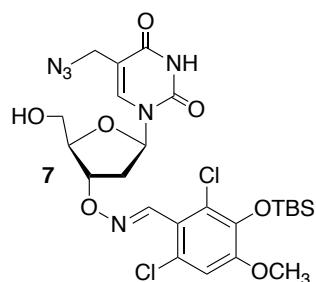

was stirred at room temperature for 1.5 h and diluted with MeOH (20 mL). The reaction mixture was concentrated under reduced pressure and the residue was purified by flash column chromatography on a silica gel column (20 × 2 cm). Elution with 1:3 → 1:2 → 2:3 ethyl

acetate–hexane gave **7** (220 mg, 84%) as a colorless oil. Silica gel TLC  $R_f$  = 0.72 (1:10:10 methanol–ethyl acetate–hexane); <sup>1</sup>H NMR (CDCl<sub>3</sub>)  $\delta$  8.46 (s, 1H), 8.30 (s, 1H), 7.87 (s, 1H), 6.85 (s, 1H), 6.32 (dd,  $J$  = 7.9, 6.0 Hz, 1H), 5.03 (d,  $J$  = 6.7 Hz, 1H), 4.39 (d,  $J$  = 2.2 Hz, 1H), 4.20 – 4.14 (m, 2H), 3.98 (dt,  $J$  = 11.8, 10.5 Hz, 2H), 3.83 (s, 3H), 2.67 (dd,  $J$  = 14.1, 4.0 Hz, 1H), 2.53 – 2.37 (m, 1H), 1.02 (s, 9H), 0.20 (d,  $J$  = 3.0 Hz, 6H); <sup>13</sup>C NMR (CDCl<sub>3</sub>)  $\delta$  162.7, 151.9, 150.2, 146.9, 141.5, 139.7, 126.7, 126.2, 121.0, 111.9, 109.9, 87.4, 85.1, 83.1, 63.2, 55.7, 47.4, 37.7, 26.0, 19.0, -3.9; HRMS (ESI-TOF) C<sub>24</sub>H<sub>33</sub>Cl<sub>2</sub>N<sub>6</sub>O<sub>7</sub>Si (M + H)<sup>+</sup> calcd.  $m/z$  615.1557, found 615.1552.

**Preparation of Phosphoramidite 11.** Alcohol **10**<sup>2</sup> (110 mg, 0.50 mmol) was dried under vacu-

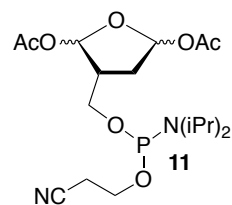

m overnight, dissolved in anhydrous CH<sub>2</sub>Cl<sub>2</sub> (4 mL), and cooled to 0 °C. *N,N*-Diisopropylethylamine (0.37 g, 0.5 mL, 2.89 mmol), followed by 2-cyanoethyl *N,N*-diisopropylchlorophosphoramidite (159 mg, 150  $\mu$ L, 0.67

mmol) were added. The mixture was stirred at 0 °C for 15 min and at room temperature for 1 h.

The reaction mixture was diluted with EtOAc (50 mL) and sat. aq. NaHCO<sub>3</sub> solution (20 mL).

The organic layer was separated, washed with brine (15 mL), dried over anhydrous Na<sub>2</sub>SO<sub>4</sub> and concentrated under reduced pressure. The residue was purified by flash column chromatography on a silica gel column (20 × 1 cm). Elution with 1:3 → 1:2 ethyl acetate–hexane gave **11** (100 mg, 48%) as a colorless foam. Silica gel TLC *R*<sub>f</sub> = 0.79 (1:10:10 methanol–ethyl acetate–hexane); <sup>1</sup>H NMR (CDCl<sub>3</sub>) δ 6.43 – 6.17 (m, 2H), 3.90 – 3.38 (m, 6H), 2.81 – 2.33 (m, 4H), 2.15 – 1.95 (m, 6H), 1.81 (ddt, *J* = 13.4, 11.1, 4.6 Hz, 1H), 1.12 (dt, *J* = 7.1, 3.7 Hz, 12H); <sup>31</sup>P NMR (CDCl<sub>3</sub>) δ 148.3, 148.0.

**Preparation of the TBS-phosphate triester precursor to 12.** Alcohol **7** (280 mg, 0.46 mmol)

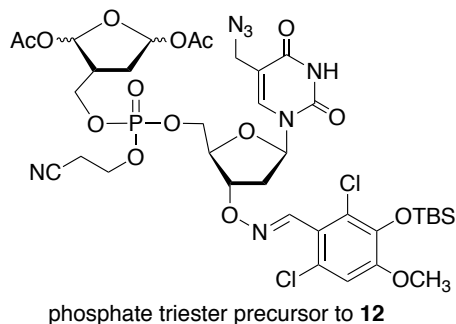

was azeotropically dried with pyridine (3 × 3 mL) and dissolved in the activator solution (5.5 mL, 0.25 M S-ethyltetrazole in THF, 1.4 mmol). This solution was then added to a reaction flask containing **11** (192 mg, 0.46 mmol) under argon and the mixture was stirred at room temperature for 30 min. A solution of *tert*-butyl hydroperoxide in decane (0.2 mL, 7 M, 1.4 mmol) was added and the mixture was stirred at room temperature for 1 h. The reaction mixture was concentrated, diluted with EtOAc (60 mL), and washed with sat. aq. NaHCO<sub>3</sub> (15 mL), H<sub>2</sub>O (20 mL), and brine (15 mL). The EtOAc layer was dried over Na<sub>2</sub>SO<sub>4</sub> and concentrated under reduced pressure. The residue was purified by flash column chromatography on a silica gel column (25 × 2 cm). Elution with 1:2 ethyl acetate–hexane → 0.1:3:2 methanol–ethyl acetate–hexane gave the phosphate triester precursor to **12** (270 mg, 62%) as a colorless foam. Silica gel TLC *R*<sub>f</sub> = 0.28 (1:10:10 methanol–ethyl acetate–hexane); <sup>1</sup>H NMR (CDCl<sub>3</sub>) δ 9.77 (t, *J* = 13.0 Hz, 1H), 8.27 (s, 1H), 7.77 (s, 1H), 6.83 (s, 1H), 6.48 – 6.19 (m, 3H), 5.04 – 4.78 (m, 1H), 4.52 – 4.10 (m, 9H), 3.81 (d, *J* = 5.9 Hz, 3H), 2.98 – 2.34 (m, 5H), 2.25 (dd, *J* = 13.5, 6.1 Hz, 1H), 2.11

– 2.01 (m, 6H), 1.92 – 1.75 (m, 1H), 0.98 (s, 9H), 0.15 (s, 6H);  $^{31}\text{P}$  NMR ( $\text{CDCl}_3$ )  $\delta$  -1.8, -1.9, -2.0; HRMS (ESI-TOF)  $\text{C}_{36}\text{H}_{48}\text{N}_7\text{O}_{15}\text{SiNaPCl}_2$  ( $\text{M} + \text{Na}$ ) $^+$  calcd.  $m/z$  970.1990, found 970.1947.

**Preparation of 12.** The phosphate triester precursor to **12** (22 mg, 23  $\mu\text{mol}$ ) was dissolved in 1:3 mixture of  $\text{CH}_2\text{Cl}_2$ – $\text{Et}_3\text{N}$  (4 mL) and the mixture was heated to 60  $^\circ\text{C}$  for 16 h. The reaction

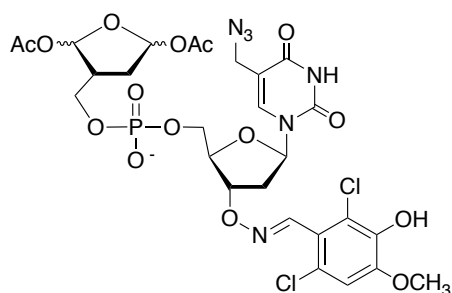

mixture was concentrated under reduced pressure and the residue was diluted with  $\text{H}_2\text{O}$  (8 mL), washed with  $\text{CH}_2\text{Cl}_2$  ( $2 \times 5$  mL), and  $\text{EtOAc}$  (5 mL). The aqueous layer was lyophilized to obtain **12** (15 mg, 83%) as a light yellow solid. TLC  $R_f$  = 0.72 (0.1:1:9 triethylamine–methanol–

dichloromethane);  $^1\text{H}$  NMR ( $\text{D}_2\text{O}$ )  $\delta$  8.22 (s, 1H), 7.96 (s, 1H), 6.92 (s, 1H), 6.30 (s, 1H), 6.21 – 6.04 (m, 2H), 4.96 (s, 1H), 4.39 (s, 1H), 4.16 – 3.85 (m, 6H), 3.78 (s, 3H), 2.77 – 2.21 (m, 4H), 2.04 – 1.90 (m, 6H), 1.76 (m, 1H);  $^{31}\text{P}$  NMR ( $\text{D}_2\text{O}$ )  $\delta$  -0.2; HRMS (ESI-TOF)  $\text{C}_{27}\text{H}_{30}\text{N}_6\text{O}_{15}\text{PCl}_2$  ( $\text{M} - \text{H}$ ) $^-$  calcd.  $m/z$  779.0841, found 779.0884.

**Scheme S1.** Alternative synthesis of pro-13.

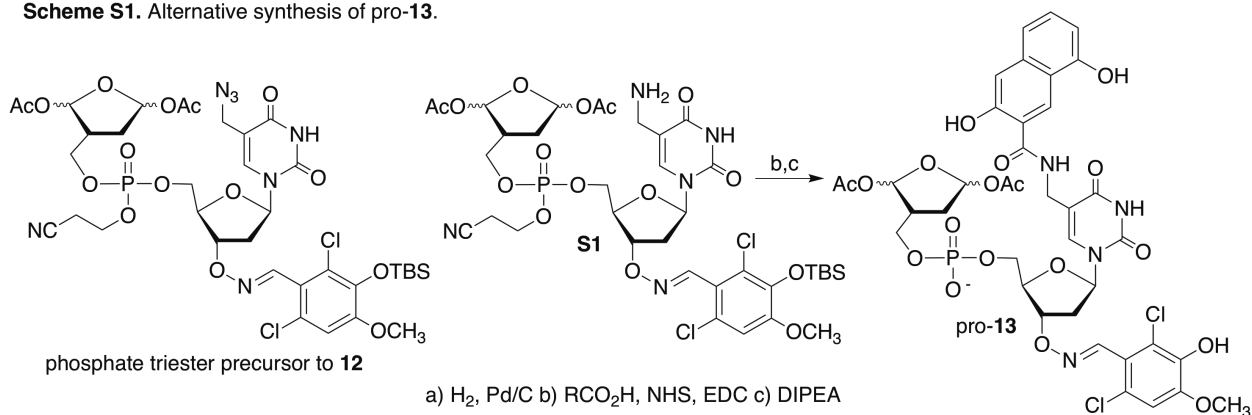

**Preparation of pro-13 from the TBS-phosphate triester precursor to 12 (Scheme S1).** AcOH (50  $\mu\text{L}$ ) and palladium on carbon (5 mg, 10% by wt.) were added to a solution containing the

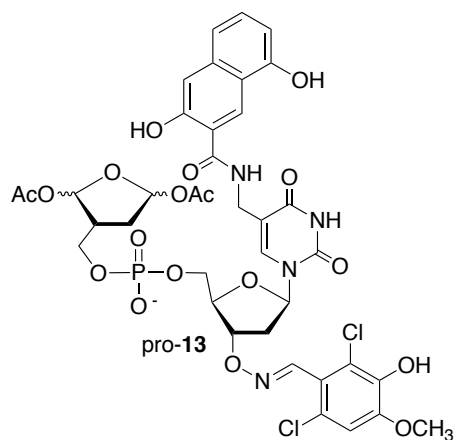

phosphate triester protected precursor of **12** (9 mg, 9.5  $\mu\text{mol}$ ). The resulting suspension was bubbled with  $\text{H}_2$  for 10 min and then stirred at room temperature for 2 h under  $\text{H}_2$ . The reaction mixture was filtered and concentrated to obtain protected amine (**S1**), which was used for the next step without any purification; yield 7.5 mg (85%).

Dihydroxy naphthalene carboxyl acid (100  $\mu\text{L}$ , 0.2 M, 20  $\mu\text{mol}$  in DMF), *N*-hydroxysuccinimide (200  $\mu\text{L}$ , 0.2 M, 20  $\mu\text{mol}$  in DMF), and 1-ethyl-3-(3-dimethylaminopropyl)carbodiimide (100  $\mu\text{L}$ , 0.2 M, 20  $\mu\text{mol}$  in DMF) was incubated at room temperature for 2 h. The solution containing the activated acid was then treated with a solution of **S1** (7.5 mg, 8.1  $\mu\text{mol}$ ) in DMF (0.9 mL) and phosphate buffer (pH 7.2, 10 mM, 1 mL). The mixture was incubated at room temperature overnight. The mixture was subsequently concentrated to  $\sim 0.2$  mL and treated with a solution of DIPEA in DMF (33% by vol., 1.5 mL). The mixture was incubated 55  $^\circ\text{C}$  for 4 h, and purified by reverse phase HPLC on a C18 column, Waters Delta Pak 300 x 7.8 mm. A gradient of 5  $\rightarrow$  40% ACN in 0.1 M aq. ammonium acetate over 15 min and a second gradient of 40  $\rightarrow$  100% ACN in 0.1 M aq. ammonium acetate over 2 min was employed at a flow rate of 5 mL/min. The peak at 14.0 min was collected and lyophilized to obtain pro-**13** (1.5 mg, 19%) as a yellow solid.  $^1\text{H}$  NMR ( $\text{CD}_3\text{CN}-\text{D}_2\text{O}$ , a few drops of  $\text{D}_2\text{O}$ )  $\delta$  8.51-8.47 (m, 1H), 8.37 – 8.17 (m, 2H), 7.93 (s, 1H), 7.54 – 7.34 (m, 1H), 7.14 – 6.80 (m, 2H), 6.32 – 6.10 (m, 4H), 4.97 (br s, 1H), 4.49 – 4.16 (m, 4H), 4.06 – 3.87 (m, 7H), 3.85 (m, 6H), 2.63 – 2.47 (m, 1H), 2.38 – 2.30 (m, 2H), 2.11 – 2.09 (m, 1H), 2.02 – 1.96 (m, 6H);  $^{31}\text{P}$  NMR ( $\text{CD}_3\text{CN}-\text{D}_2\text{O}$ , a few drops of  $\text{D}_2\text{O}$ )  $\delta$  -0.7; HRMS (ESI-TOF)  $\text{C}_{38}\text{H}_{38}\text{Cl}_2\text{N}_4\text{O}_{18}\text{P}$  ( $\text{M} - \text{H}$ ) $^-$  calcd.  $m/z$  939.1296, found 939.1304.

**Preparation of 13.** A suspension of pro-**13** (1.0 mg, 0.94  $\mu\text{mol}$ ) in ACN containing 2%  $\text{H}_2\text{O}$  (1

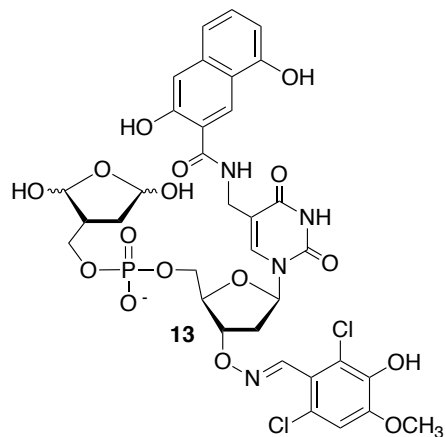

mL) was treated with a solution of  $\text{BF}_3 \cdot \text{Et}_2\text{O}$  in ACN (100  $\mu\text{L}$ , 0.4 M, 0.04 mmol) at room temperature for 1.0 h at which time analysis by  $\text{C}_{18}$ -HPLC analysis showed complete disappearance of pro-**13** and formation of **13**. The reaction mixture was diluted with phosphate buffer (1 mL, 10 mM, pH 7.2) and concentrated to  $\sim 0.5$  mL. The crude mixture was purified by a  $\text{C}_{18}$  silica plug in a Pasteur pipette (2

inches). Elution with 0%  $\rightarrow$  20% ACN in  $\text{H}_2\text{O}$  gave of **13** (0.4 mg, 44%).  $^1\text{H}$  NMR ( $\text{DMSO}-d_6$ )  $\delta$  8.45 – 8.20 (m, 2H), 8.03 – 7.80 (m, 1H), 7.64 – 7.23 (m, 1H), 7.98 – 6.65 (m, 3H), 6.45 – 5.98 (m, 2H), 5.35 – 4.81 (m, 3H), 4.01 – 3.65 (m, 8H), 3.15 – 2.69 (m, 3H), 2.15 – 1.77 (m, 4H);  $^{31}\text{P}$  NMR ( $\text{CD}_3\text{CN}-\text{D}_2\text{O}$ )  $\delta$  0.45; HRMS (ESI-TOF)  $\text{C}_{34}\text{H}_{34}\text{Cl}_2\text{N}_4\text{O}_{16}\text{P}$  ( $\text{M} - \text{H}$ ) $^-$   $m/z$  calcd. 855.1055, found 855.1030.

**Deoxyribose phosphate (dRP)- aldehyde reactive probe (ARP) adduct formation.** To study the reactivity of ARP towards deoxyribose phosphate (dRP), the photochemical precursor to **15** ( $\sim 20,000$  cpm) was diluted to 30  $\mu\text{L}$  in  $1 \times \text{PBS}$ .<sup>2</sup> A 6  $\mu\text{L}$  of solution was removed as unphotolyzed control. The remaining solution (24  $\mu\text{L}$ ) was photolyzed (350 nm in a Rayonet photoreactor) for 10 min at room temperature. Immediately after photolysis, two aliquots (6  $\mu\text{L}$ ) were removed from the reaction. One aliquot was treated with 0.1 N NaOH at 37  $^\circ\text{C}$  for 30 min and the other with  $\text{NaBH}_4$  (0.1 M) for 1 h at 4  $^\circ\text{C}$ . The NaOH treated sample was then neutralized with 0.1 N HCl. The other two aliquots (6  $\mu\text{L}$  each) were treated with 10  $\mu\text{L}$  of ARP solution (from DNA damage quantification kit from Dojindo Molecular Technologies (DK02-12)). One of the reactions was quenched with  $\text{NaBH}_4$  (0.1 M, final concentration). All of the



aliquots were then analyzed directly by 20 % denaturing PAGE ( $40 \times 32 \times 0.04$  cm). The gel was run under limiting power (55 W) until the bromophenol blue band migrated to the bottom.

**Cell culture.** HeLa (human cervical carcinoma) cells were maintained in Dulbecco's Modified Eagle's Medium (DMEM), supplemented with 10% fetal bovine serum (FBS),  $100 \text{ U mL}^{-1}$  of penicillin and  $100 \text{ } \mu\text{g mL}^{-1}$  of streptomycin at  $37^\circ\text{C}$  in a humidified incubator at 5%  $\text{CO}_2$ . The adherent cultures were grown as a monolayer and passaged once after 3-4 days by trypsinizing with 0.25% Trypsin-EDTA. At 90 % confluency, there are around  $1.5 \times 10^7$  cells in one dish of  $150 \text{ mm} \times 25 \text{ mm}$ .

**Cell viability assay.** Approximately  $10^6$  HeLa cells were plated in each well of a 6 well culture plate (well size;  $35 \text{ mm} \times 18 \text{ mm}$ ) in DMEM containing 10% FBS (2 mL) and kept for 24 h at  $37^\circ\text{C}$  in a  $\text{CO}_2$  incubator. After the indicated time, the medium was removed from the cell culture by aspiration, and washed once with PBS. A stock solution of bleomycin sulphate (1 mM) in DMSO was diluted in the culture medium to  $2 \text{ } \mu\text{M}$  and then added to the plates keeping the quantity of DMSO constant at 1% for all tests. Cells were then incubated for 2 h at  $37^\circ\text{C}$  in a  $\text{CO}_2$  incubator. The medium was then subsequently replaced with fresh DMEM-FBS and incubation was continued for an additional 1 or 2 h at  $37^\circ\text{C}$  in a  $\text{CO}_2$  incubator. After the indicated time, cells were trypsinized with 0.25% w/v Trypsin-EDTA ( $100 \text{ } \mu\text{L}$  in each well, 2 min incubation at  $37^\circ\text{C}$ ) and the cell suspension was prepared in 1 mL PBS. A portion ( $10 \text{ } \mu\text{L}$ ) of the cell suspension was thoroughly mixed with  $10 \text{ } \mu\text{L}$  of 0.4% solution of trypan blue in PBS (pH 7.2 to 7.3), and placed on a counting slide (BIO-RAD) to count the % of live cells using a TC20 automated cell counter (BIO-RAD). A control experiment without treating with bleomycin sulphate was carried out in parallel. All the experiments were carried out at least 3 times, and each experiment consisted of 3 replicates.

**Comet assay to visualize DNA damage in bleomycin treated cells.** Bleomycin sulphate treatment of HeLa cells was carried out exactly in the same way as described above. The only difference was that approximately  $2 \times 10^7$  HeLa cells were plated in each well of the 6 wells culture plate. After the required incubation steps, the medium was aspirated from the cell culture, and washed with PBS (3  $\times$ ) by adding 5 mL of PBS to each well, scratching with a cell scraper (3 cm blade) and transferring the cells to a 15 mL Falcon tube. Cells were pelleted by centrifuging at 3000 g for 10 min at room temperature. Cells were resuspended in PBS and pelleted again. For the comet assay, cells were suspended in 2 mL PBS/well and counted (generally  $\sim 1 \times 10^7$  /mL). An aliquot (10  $\mu$ L) of the cell suspension was diluted to  $1 \times 10^5$  cells/mL using PBS and used in an Oxiselect™ Comet Assay Kit (Cell Biolabs, INC. Catalog number STA-350) according to the product manual (<http://www.cellbiolabs.com/sites/default/files/STA-350-comet-assay-kit.pdf>). In brief, cell samples were combined with Comet Agarose at 1:10 ratio (v/v), titrated with a pipette to mix, and immediately pipette 75  $\mu$ L/well onto the OxiSelect™ Comet Slide. Ensure complete well coverage by spreading the suspension over the well with the pipette tip (Note: For multiple samples, maintain suspensions at 37 °C in a water bath to avoid gelation). Maintaining the slide horizontally, transfer the slide to 4 °C in the dark for 15 min. Carefully transfer the slide to a container containing pre-chilled lysis buffer (from the Kit;  $\sim$ 25 mL/slide). Immerse the slide in the buffer for 60 min at 4 °C in the dark. Carefully, aspirate the lysis Buffer from the container and replace with pre-chilled alkaline solution (from the Kit), pH >13 ( $\sim$ 25 mL/slide). Immerse the slide in the solution for 30 min at 4 °C in the dark. Maintaining the slide horizontally, carefully transfer the slide from the alkaline solution to a horizontal electrophoresis chamber. Fill the chamber with cold alkaline electrophoresis solution (300 mM NaOH, 1 mM EDTA, pH >13)

until the buffer level covers the slide. Apply voltage to the chamber for 30 min at 1 volt/cm electrode distance. In addition, adjust the volume of alkaline electrophoresis solution to produce a current of 300 mA. Maintaining the slide horizontally, carefully transfer the slide from the electrophoresis chamber to a clean and small container containing pre-chilled H<sub>2</sub>O (~25 mL/slide). Immerse the slide for 2 min, aspirate, and then repeat twice more. Aspirate the final water rinse and replace with cold 70% ethanol solution for 5 min. Maintaining the slide horizontally, remove the slide from the 70% ethanol solution and allow to air dry. Once the agarose and slide are completely dry, add 100 µL/well of 1 × Vista Green DNA Dye (from the Kit). Incubate at room temperature for 15 min. View slides by a fluorescence microscopy using a FITC filter. A control experiment without any bleomycin sulphate treatment was carried out in parallel. All the experiments were carried at least 3 times each consisting of 3 replicates. The relative tail lengths were determined with Open Comet software.

**Clonogenic assay for cell survival.** HeLa cells ( $2 \times 10^5$ ) were seeded in each well of a 24 well culture plate (well size; 15.5 mm X 18 mm) in 1 mL Dulbecco's Modified Eagle Medium (DMEM) growth medium supplemented with 10% FBS. After overnight incubation at 37 °C in a humidified atmosphere of 5% CO<sub>2</sub>, cells were subjected to the appropriate DNA damaging conditions (or controls). For alkylation experiments, cells were incubated with MMS (0, 0.1, or 0.2 mM), with or without pro-**13** (5 µM) for 1 or 2 h. For experiments involving recovery after MMS treatment, the medium containing MMS and/or pro-**13** was replaced after 2 h with fresh medium with or without pro-**13** (5 µM) and incubation continued for 2–8 h. For BLM experiments, cells were incubated with BLM (2 µM), with or without pro-**13** (5 µM) for 2 h, at which time the medium was replaced with fresh medium containing only pro-**13** (5 µM) and incubation was continued for 2 h. The growth medium was then removed from each well and the

cells were washed with PBS ( $2 \times 1$  mL). The cells were treated for 2 min with 0.25% Trypsin-EDTA (50  $\mu$ L in each well) at 37 °C to detach them from the plates and then diluted in DMEM-FBS medium (0.5 mL/well). The single cell suspensions were collected in 1.6 mL tubes and counted using a Bio-Rad TC20 Automated Cell Counter. Stock solutions of single cell suspensions were made in two groups for each concentration with 500 cells/mL (for untreated control) and 1500 cells/mL (for treated cells), respectively. These cells were seeded in 6 well plates (well size; 35 mm  $\times$  18 mm) in 2 mL of 10% DMEM-FBS. The plates were incubated in humidified atmosphere with 5% CO<sub>2</sub> for 7 days. After 7 days, the growth medium was discarded and the attached cells were treated with 0.2% w/v crystal violet solution. The excess dye was washed with water and the colonies were counted under a stereomicroscope. Plating efficiencies (PE) and survival fractions (SF) were calculated as follows: PE = number of colonies  $\div$  number of cells seeded; SF = PE  $\div$  PE (control).

**AP/dRP site accumulation in genomic DNA of HeLa cells.** HeLa cells (approximately  $1 \times 10^7$ ) were plated in 150 mm  $\times$  25 mm dishes and treated with DMSO (1% final concentration), MMS (0.3 or 0.4 mM), or pro-**13** (5  $\mu$ M) alone or with a combination of MMS (0.3 or 0.4 mM), and pro-**13** (5  $\mu$ M) for 1 h at 37 °C. The cellular medium was then replaced with fresh DMEM-FBS and incubation was continued for 23 h at 37 °C in a CO<sub>2</sub> incubator in the absence or presence of pro-**13** (5  $\mu$ M). Cells were then harvested with 0.25% Trypsin-EDTA, and the genomic DNA of each sample was isolated according to Dojindo Genomic DNA isolation kit ([https://www.dojindo.com/TechnicalManual/Manual\\_GK03.pdf](https://www.dojindo.com/TechnicalManual/Manual_GK03.pdf)). The concentration of genomic DNA was measured at 260 nm and adjusted to 100 ng/ $\mu$ L. An aliquot of purified DNA (1  $\mu$ g) was labeled with 10  $\mu$ L of aldehyde reactive probe (ARP) reagent (N'-aminooxymethylcarbonylhydrazino-D-biotin), and AP/dRP sites were determined using the

DNA damage quantification kit from Dojindo Molecular Technologies (DK02-12) by measuring the absorbance at 650 nm using an ELISA microplate reader (BioRad).

**Chart S1.** Carboxylic acids used to prepare inhibitor candidates.

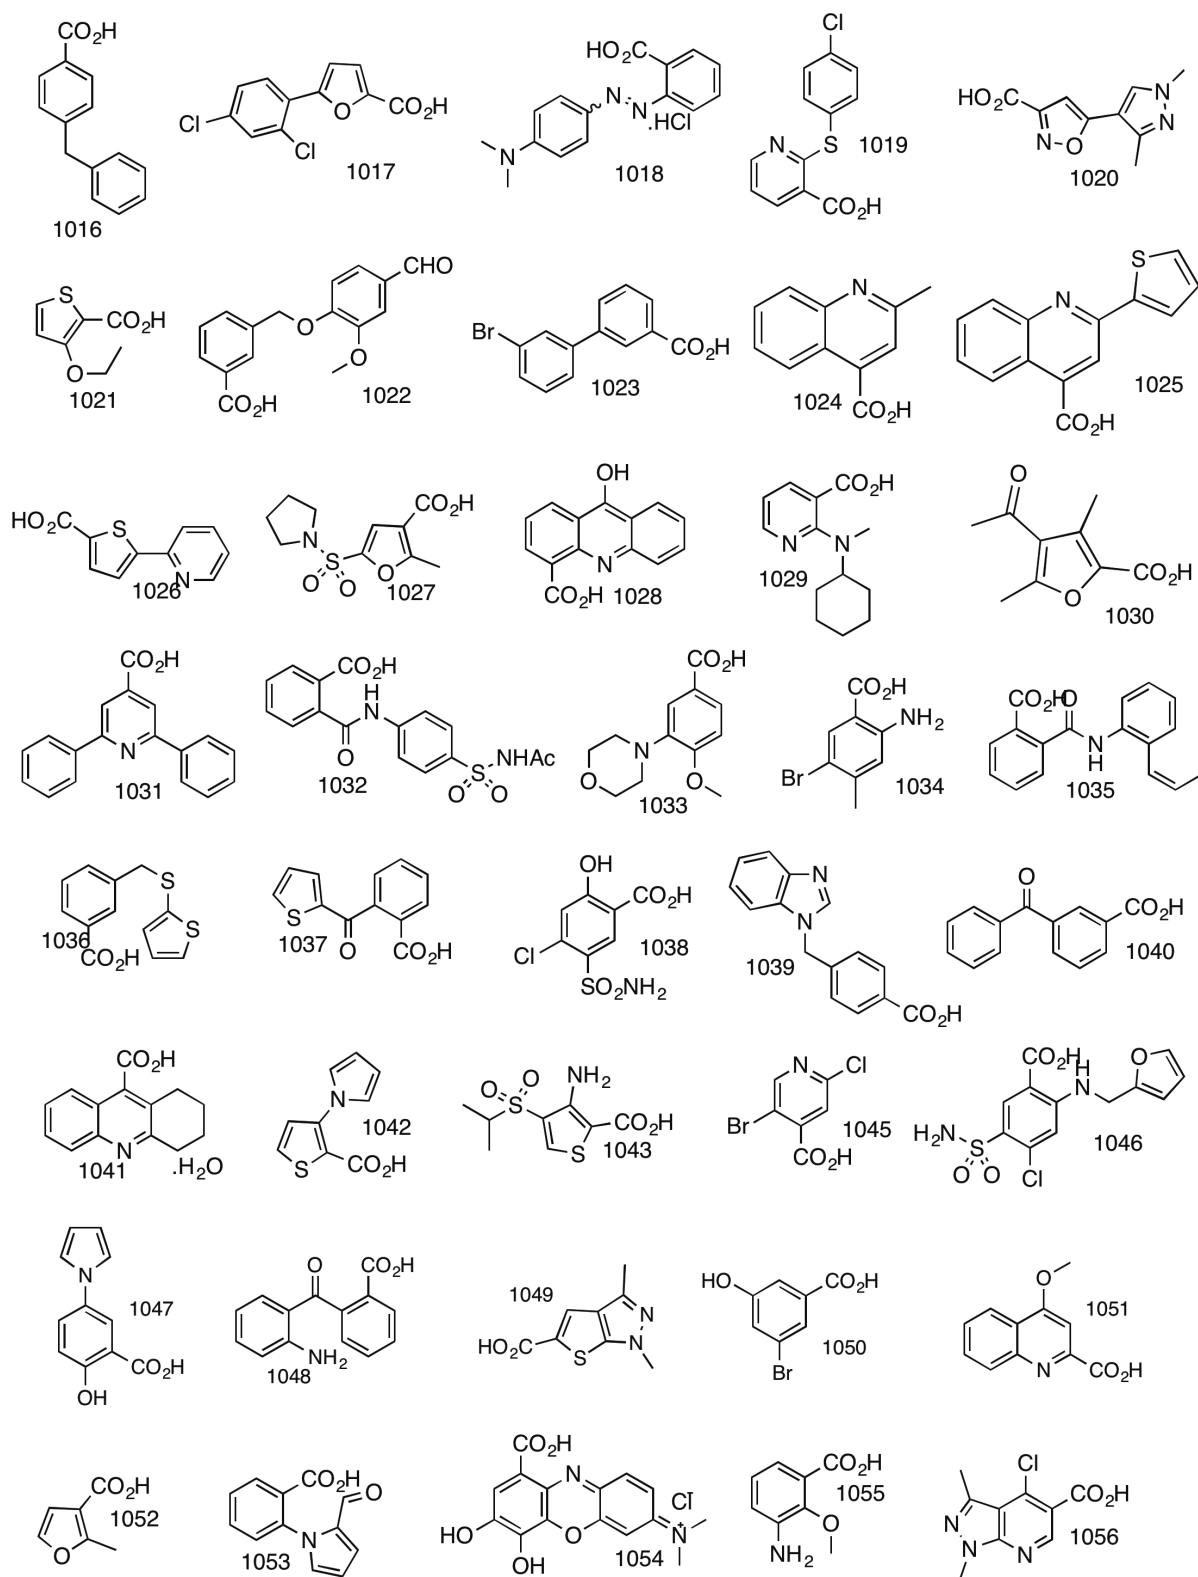

**Chart S1 (continued).** Carboxylic acids used to prepare inhibitor candidates.

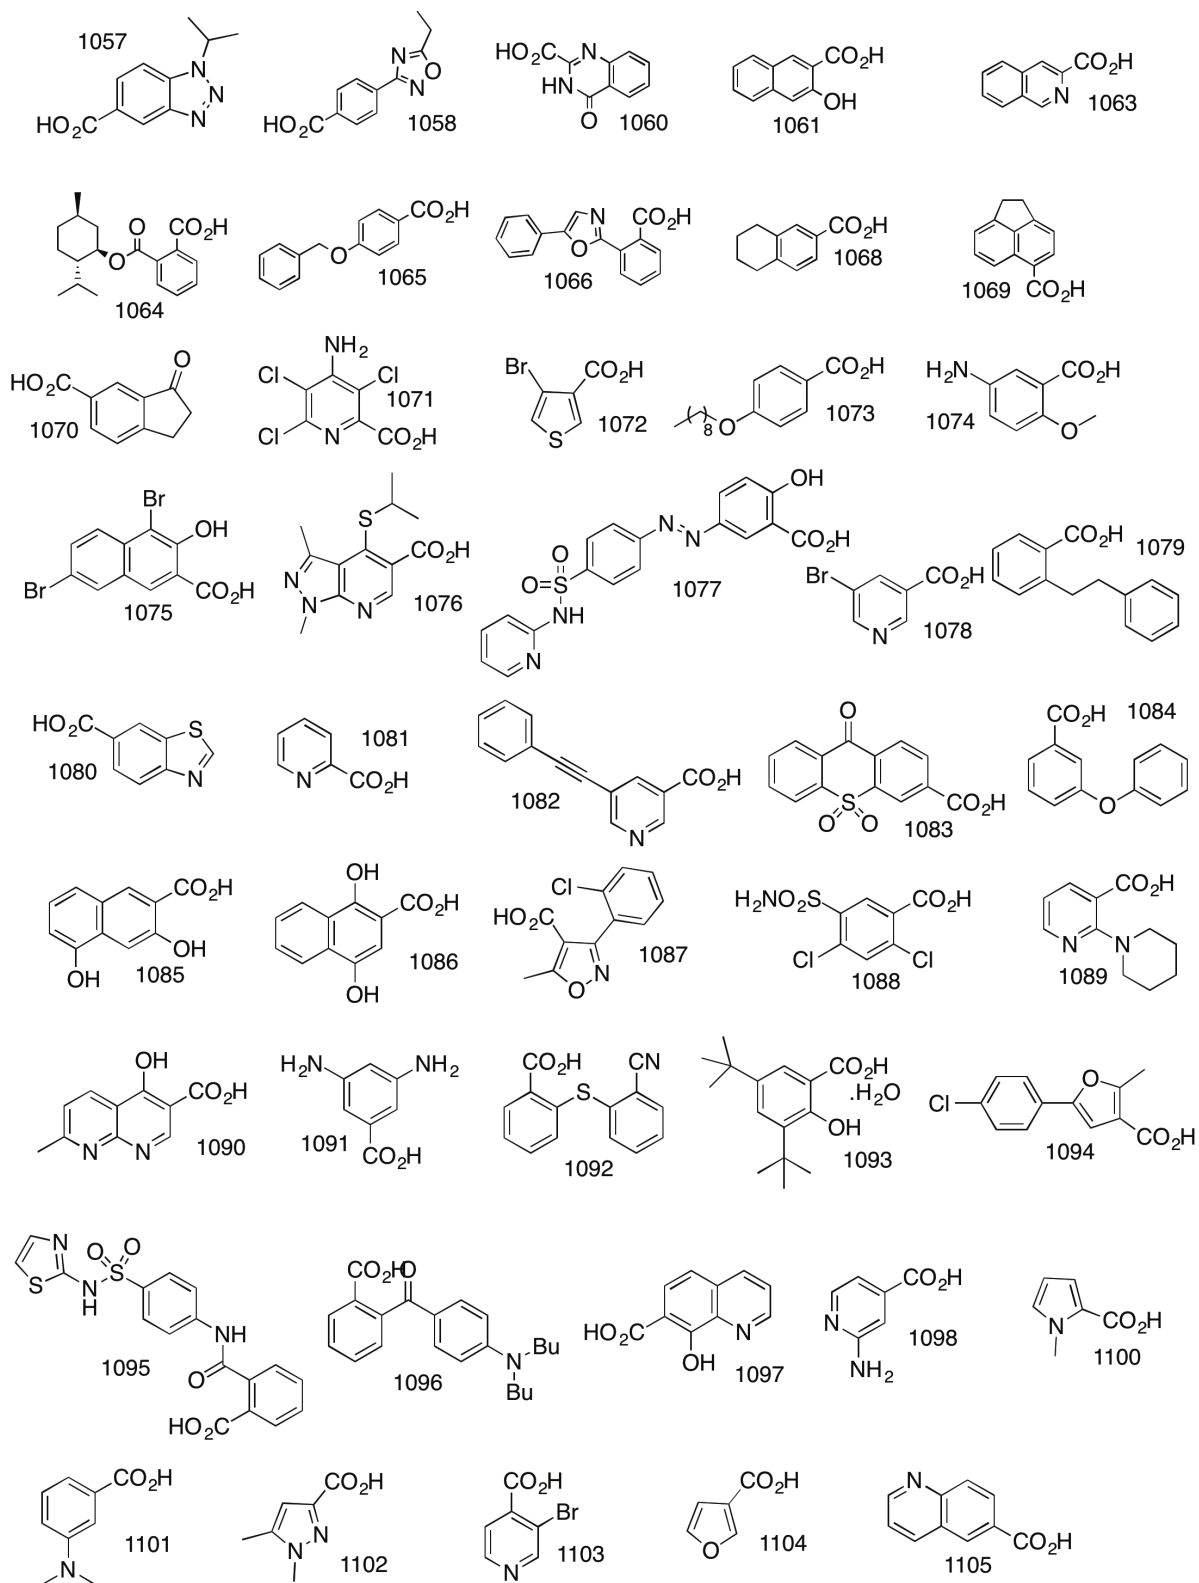

**Chart S1 (continued).** Carboxylic acids used to prepare inhibitor candidates.

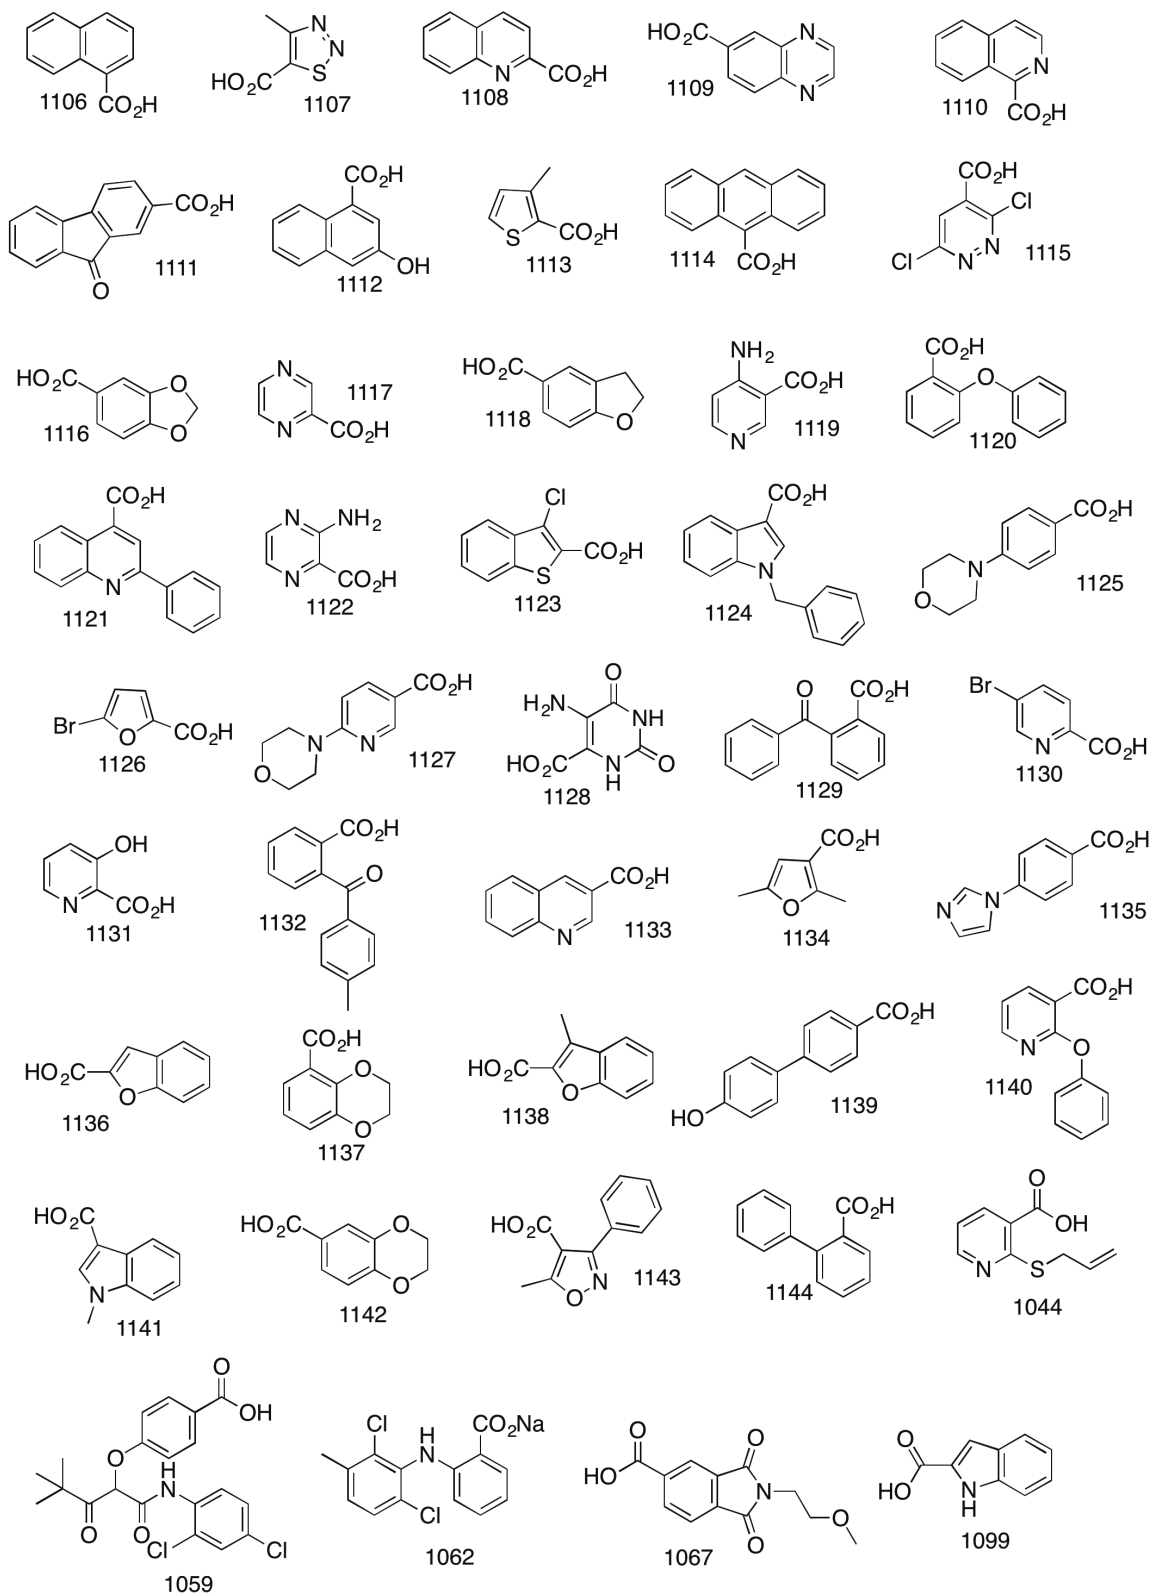



**Scheme S1.** Fluorescence screen for inhibitors.

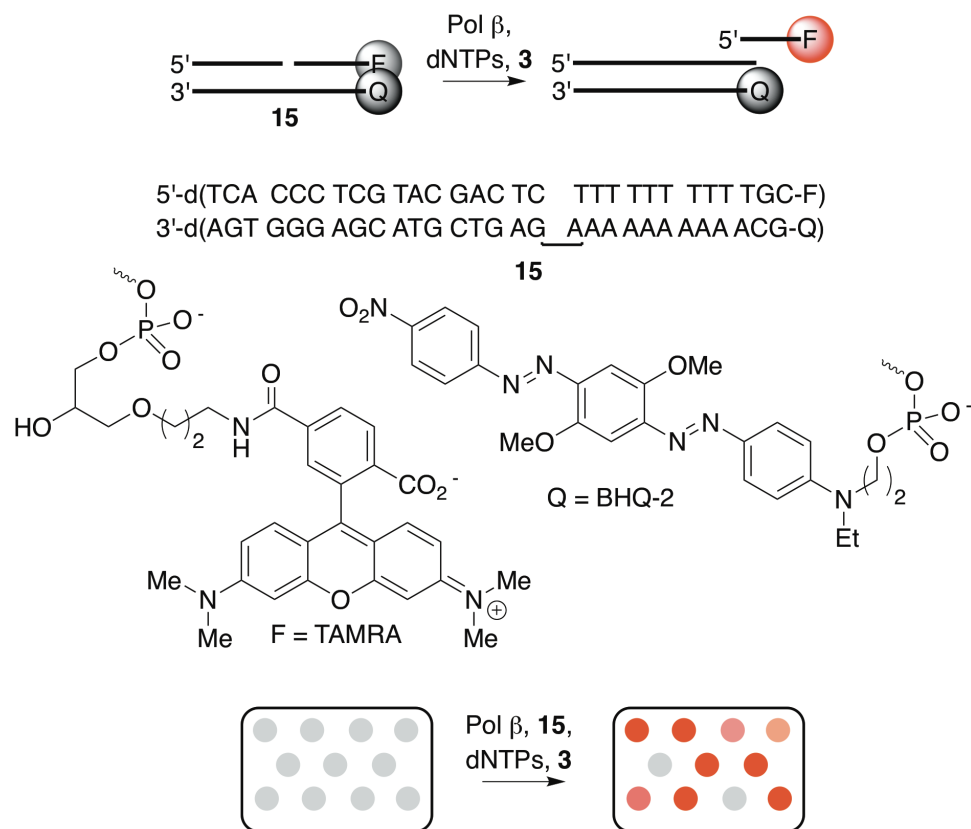

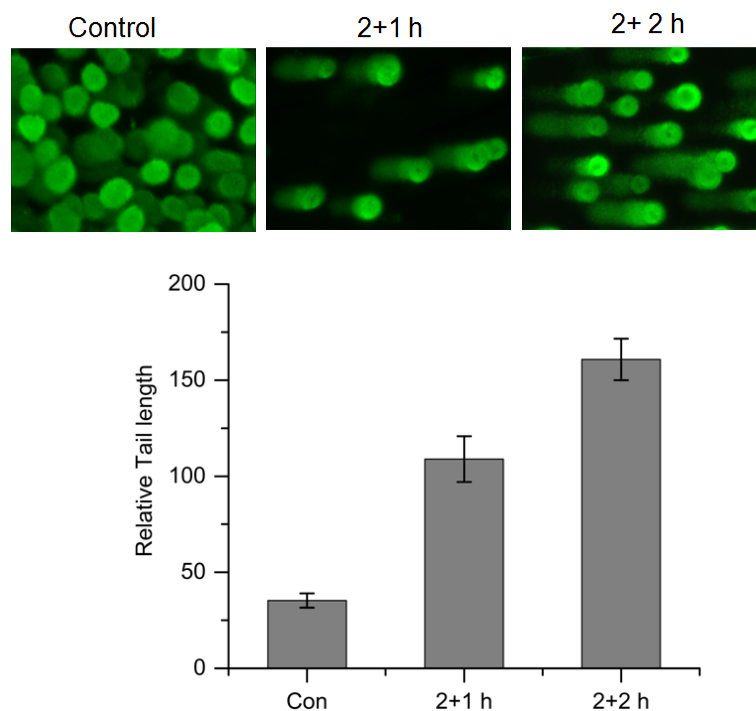

**Figure S1.** Detection of DNA damage in HeLa cells treated with bleomycin. (Top) A representative image showing increase in the tail length due to BLM treatment. (Bottom) Quantification of the relative tail lengths in the HeLa cells incubated with BLM (2  $\mu$ M) for 2 h followed by 1 h (2+1 h) and 2 h (2+2 h) recovery. (Con: BLM untreated control).

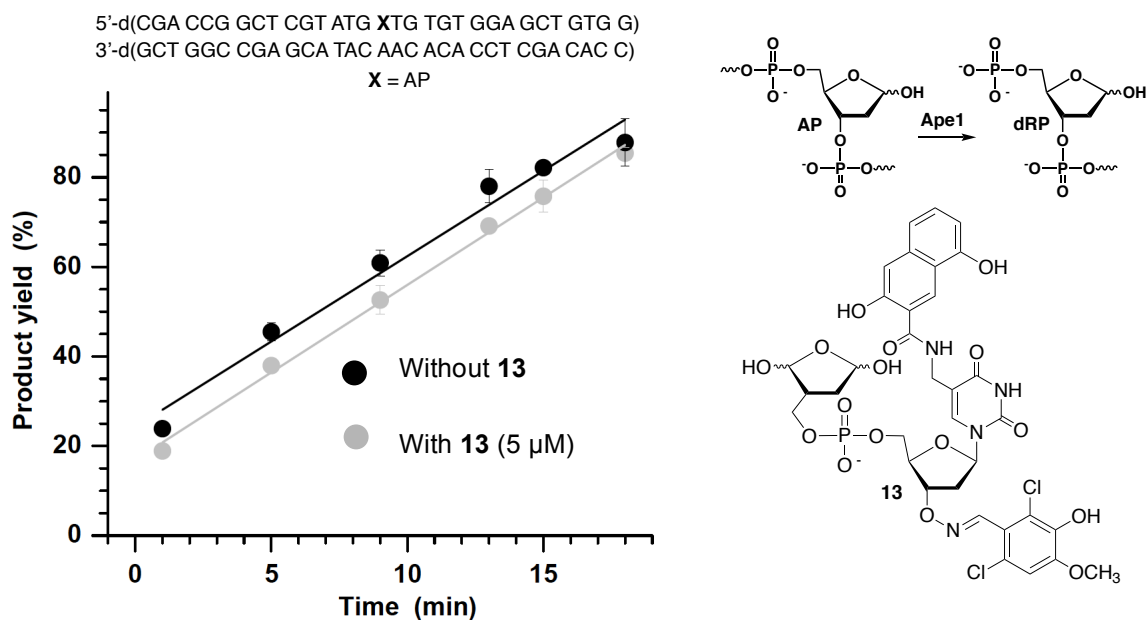

**Figure S2.** Effect of **13** on Ape1 activity.

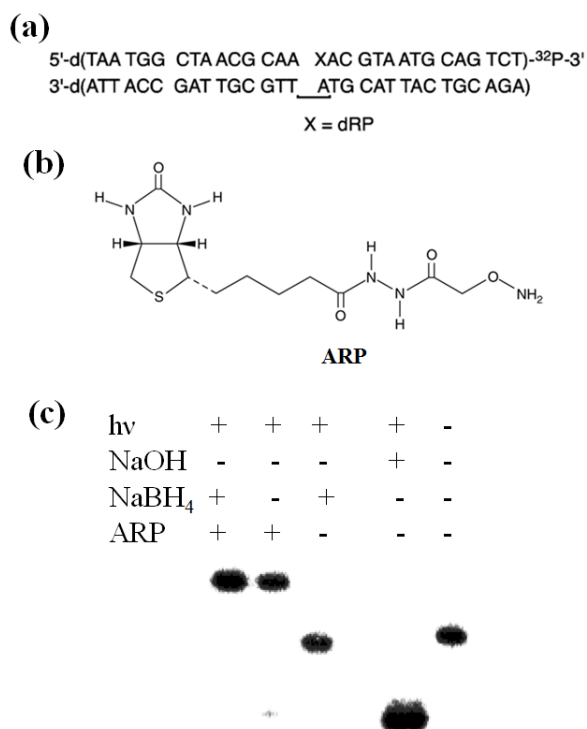

**Figure S3.** Demonstration that ARP reacts with dRP in **14**. (a) dRP containing 3'-<sup>32</sup>P-**14**. (b) The aldehyde reactive probe (ARP) (c) 20 % Denaturing PAGE gel diagram showing the dRP-ARP adduct formation with other controls.

**Chart S2.** Inhibitor candidates identified from fluorescence screen.

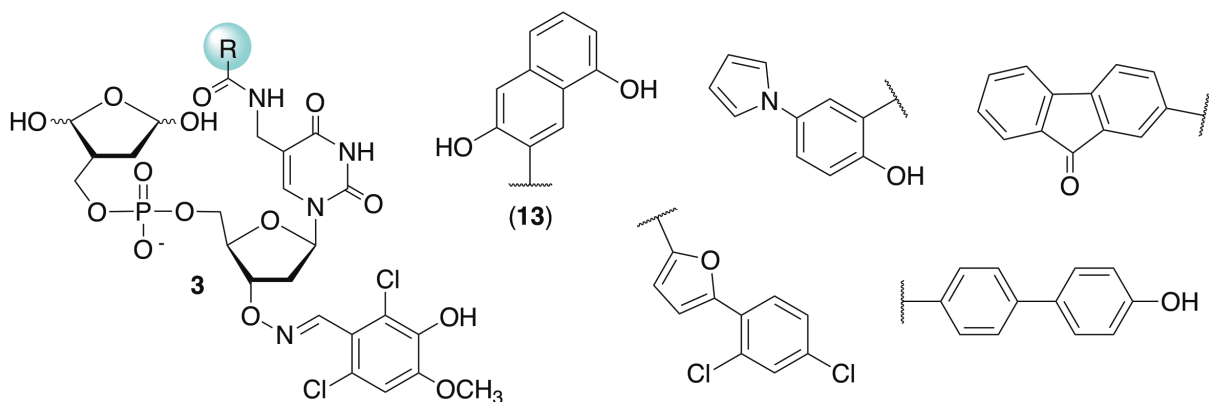

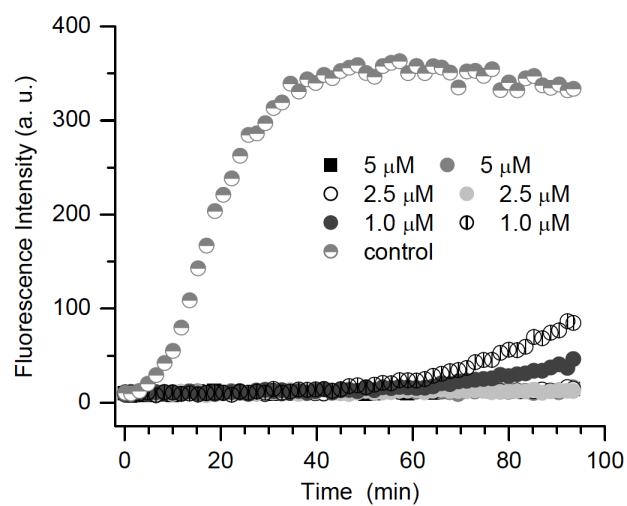

**Figure S4.** Concentration dependence of effect of **13** on strand displacement synthesis in **15** by Pol  $\beta$  measured via fluorescence.

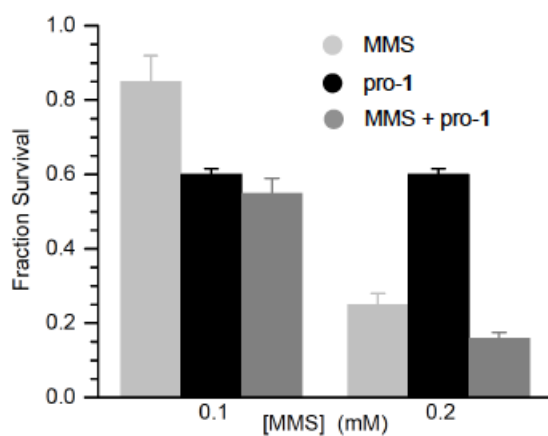

**Figure S5.** HeLa cell cytotoxicity following treatment with MMS and/or pro-1 (5  $\mu$ M) for 2 h.

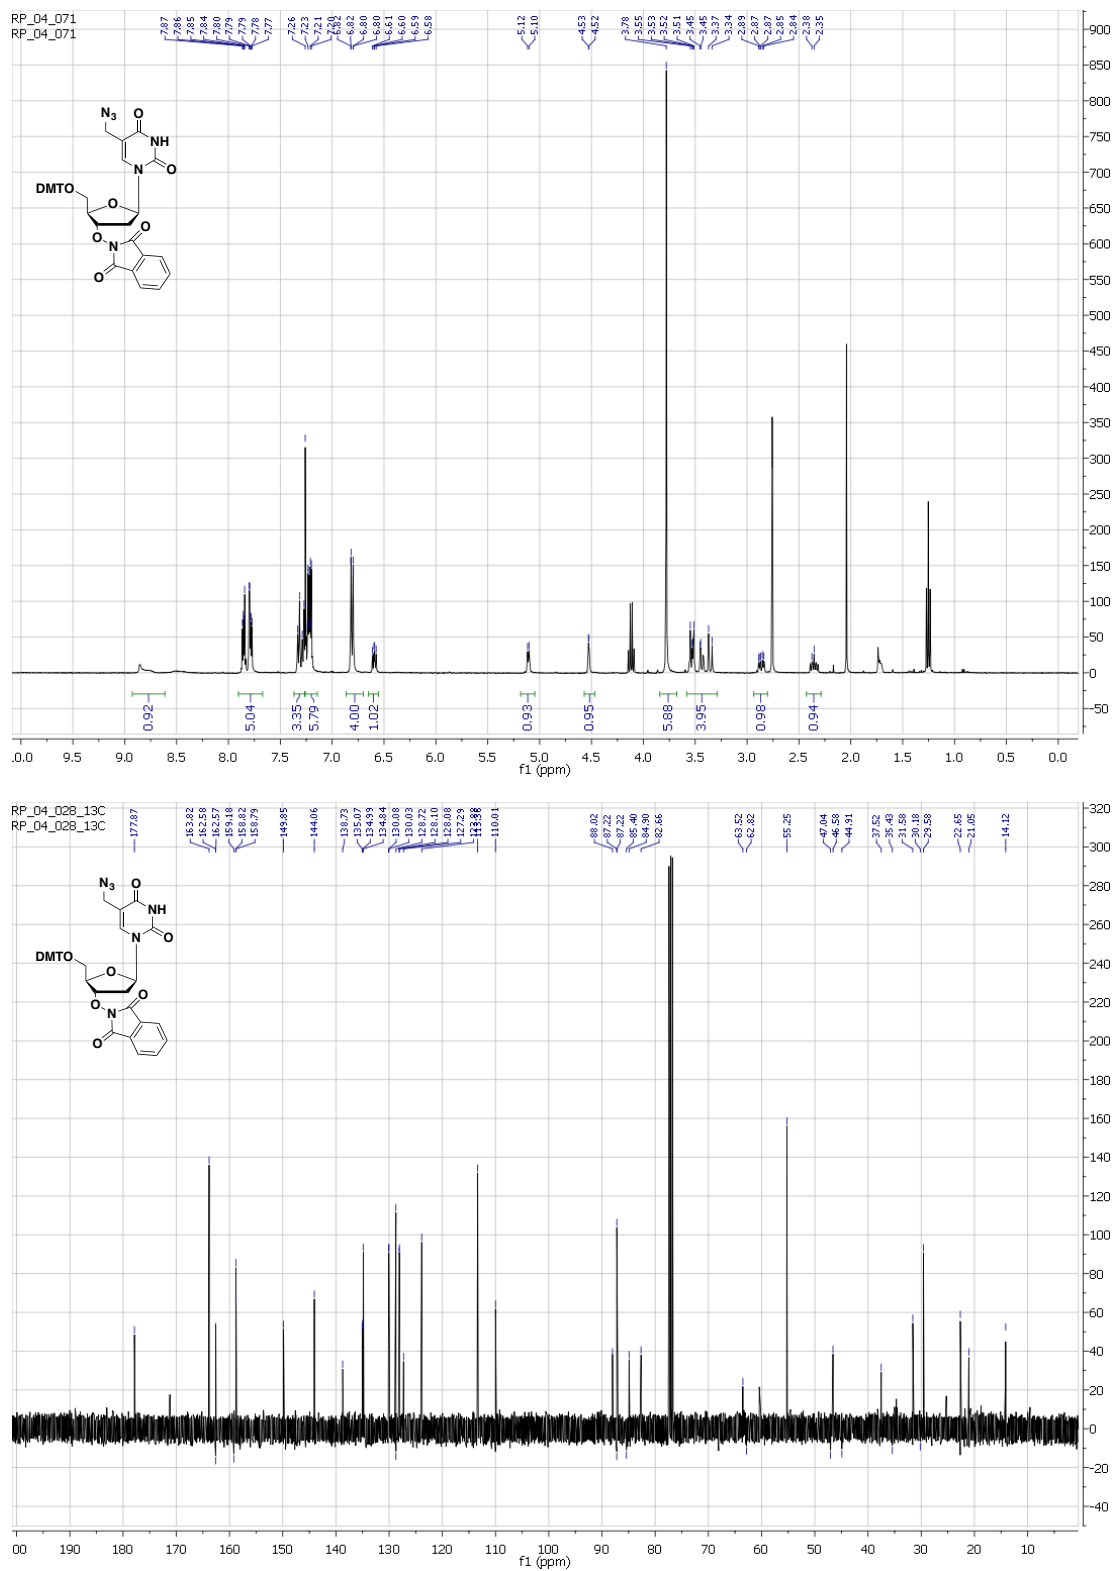

Figure S6.  $^1\text{H}$  and  $^{13}\text{C}$  NMR spectra of **5**.

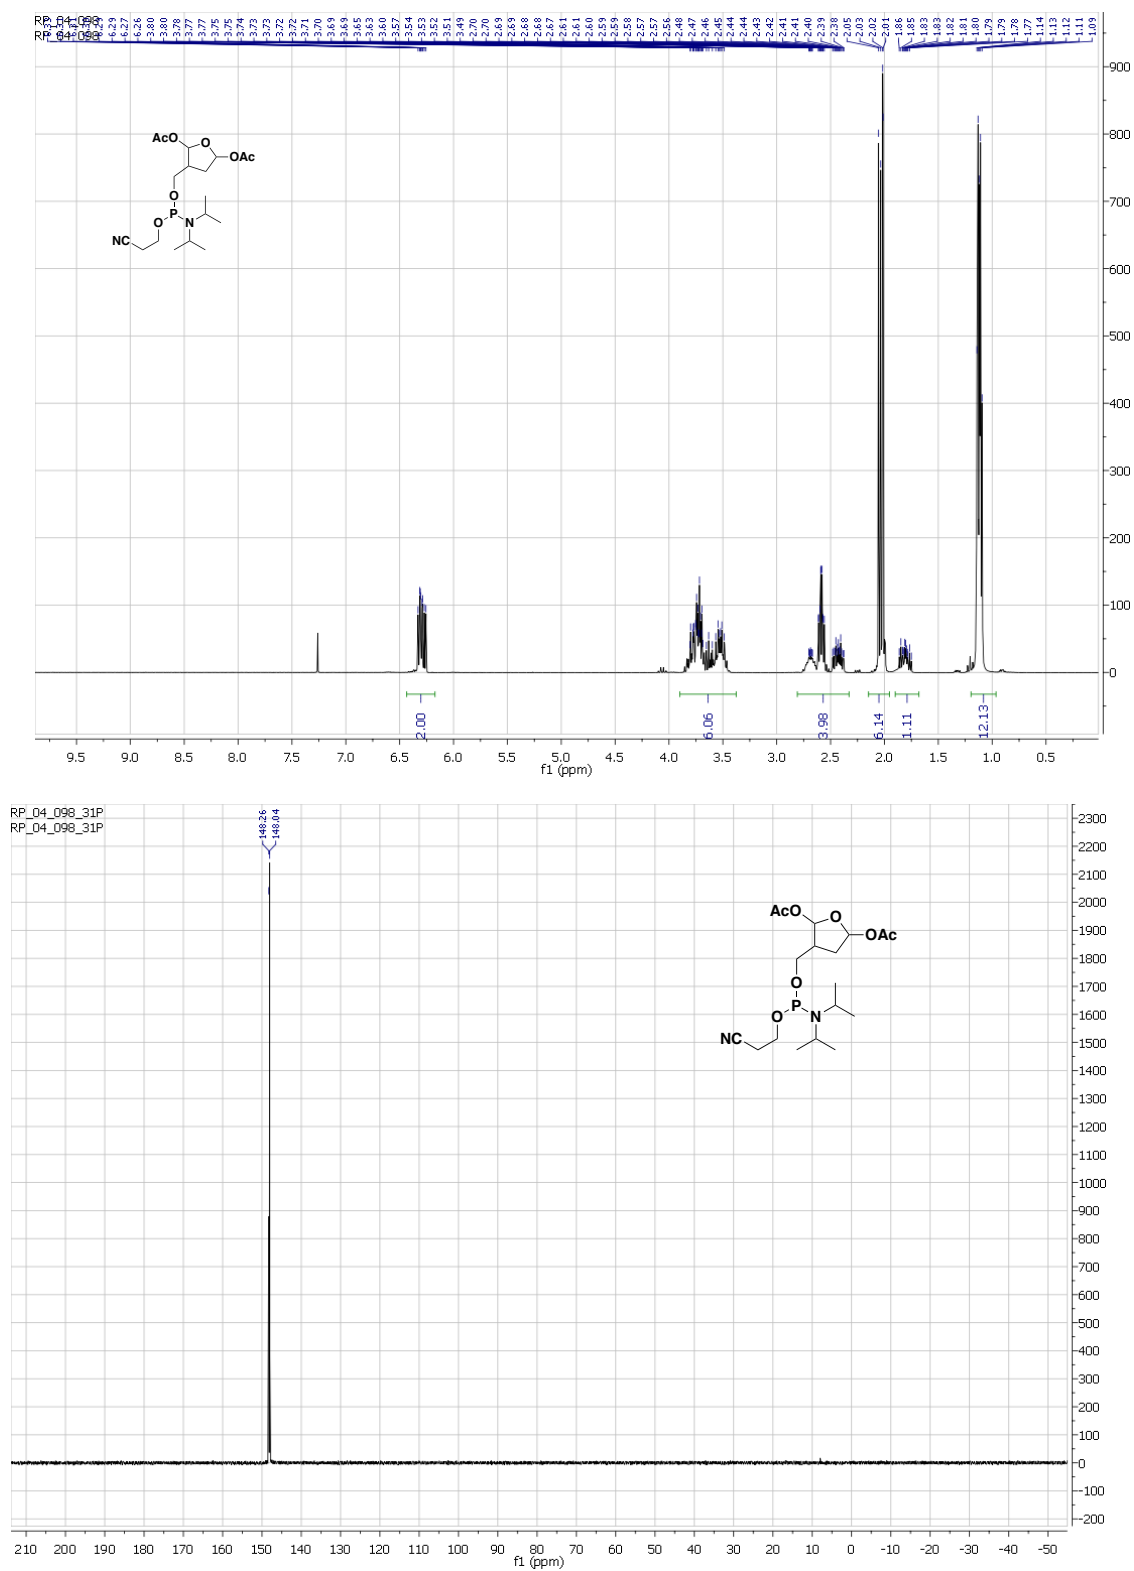

**Figure S7.** <sup>1</sup>H and <sup>31</sup>P NMR spectra of **11**.

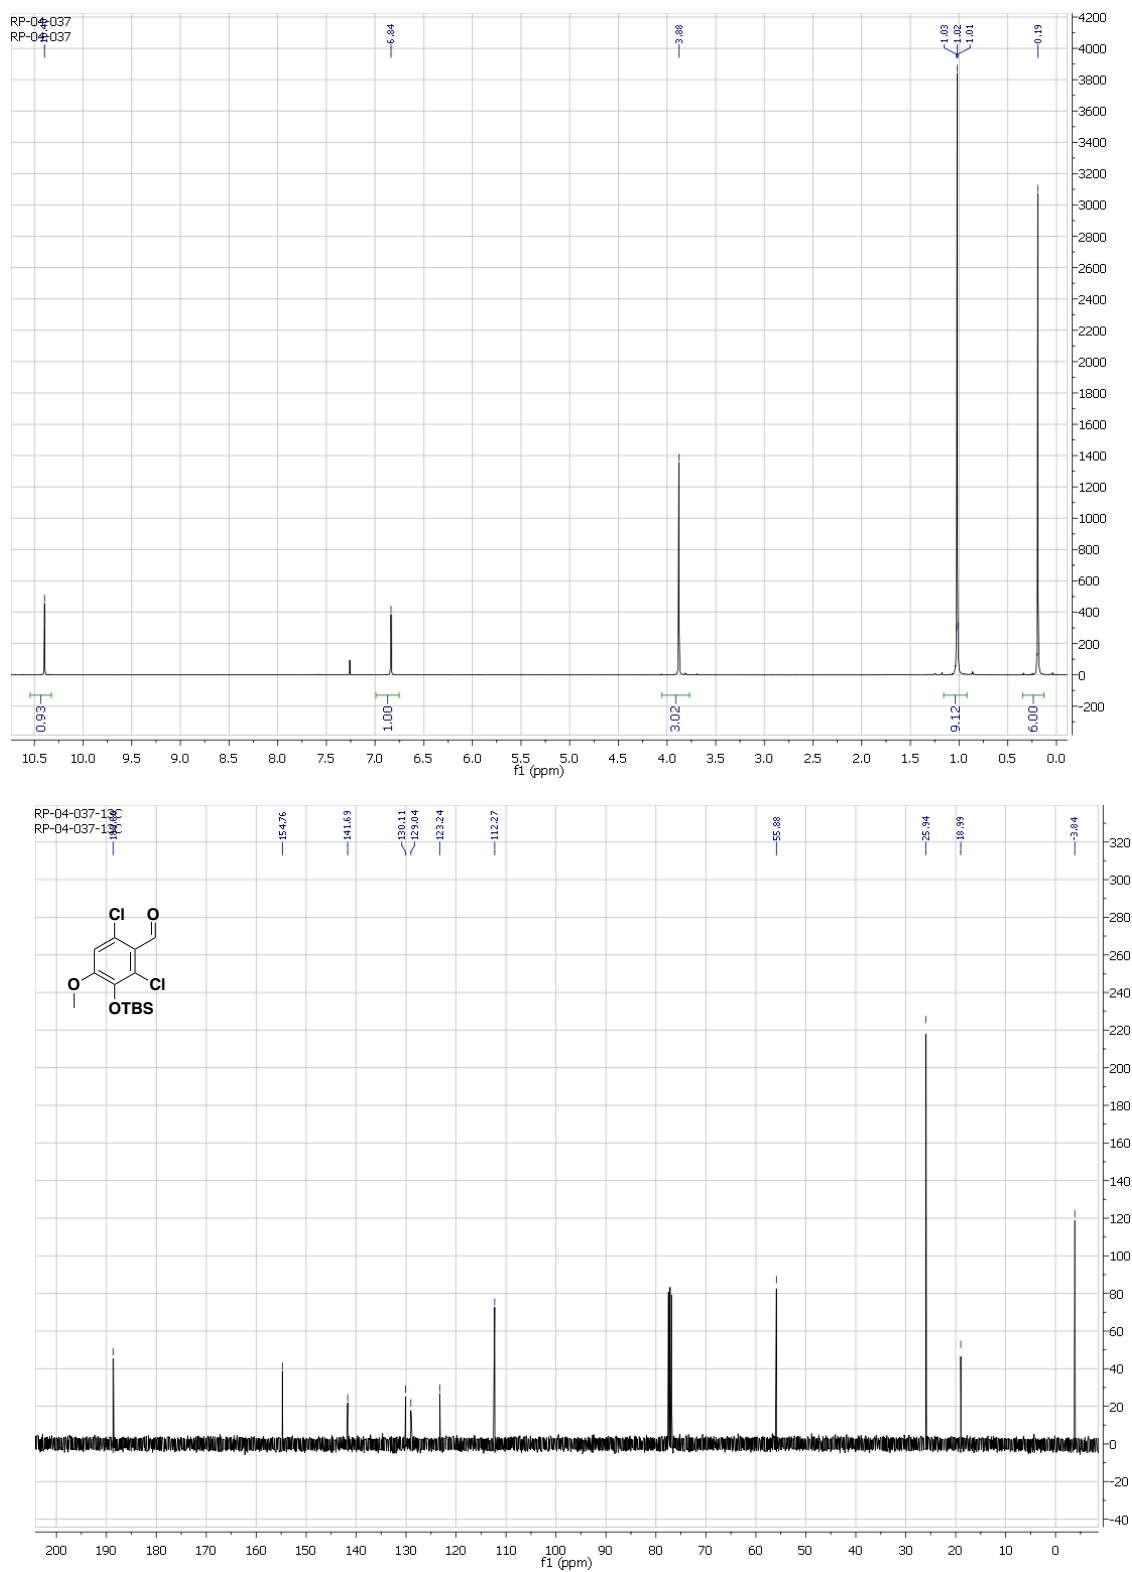

**Figure S8.** <sup>1</sup>H and <sup>13</sup>C NMR spectra of **9**.

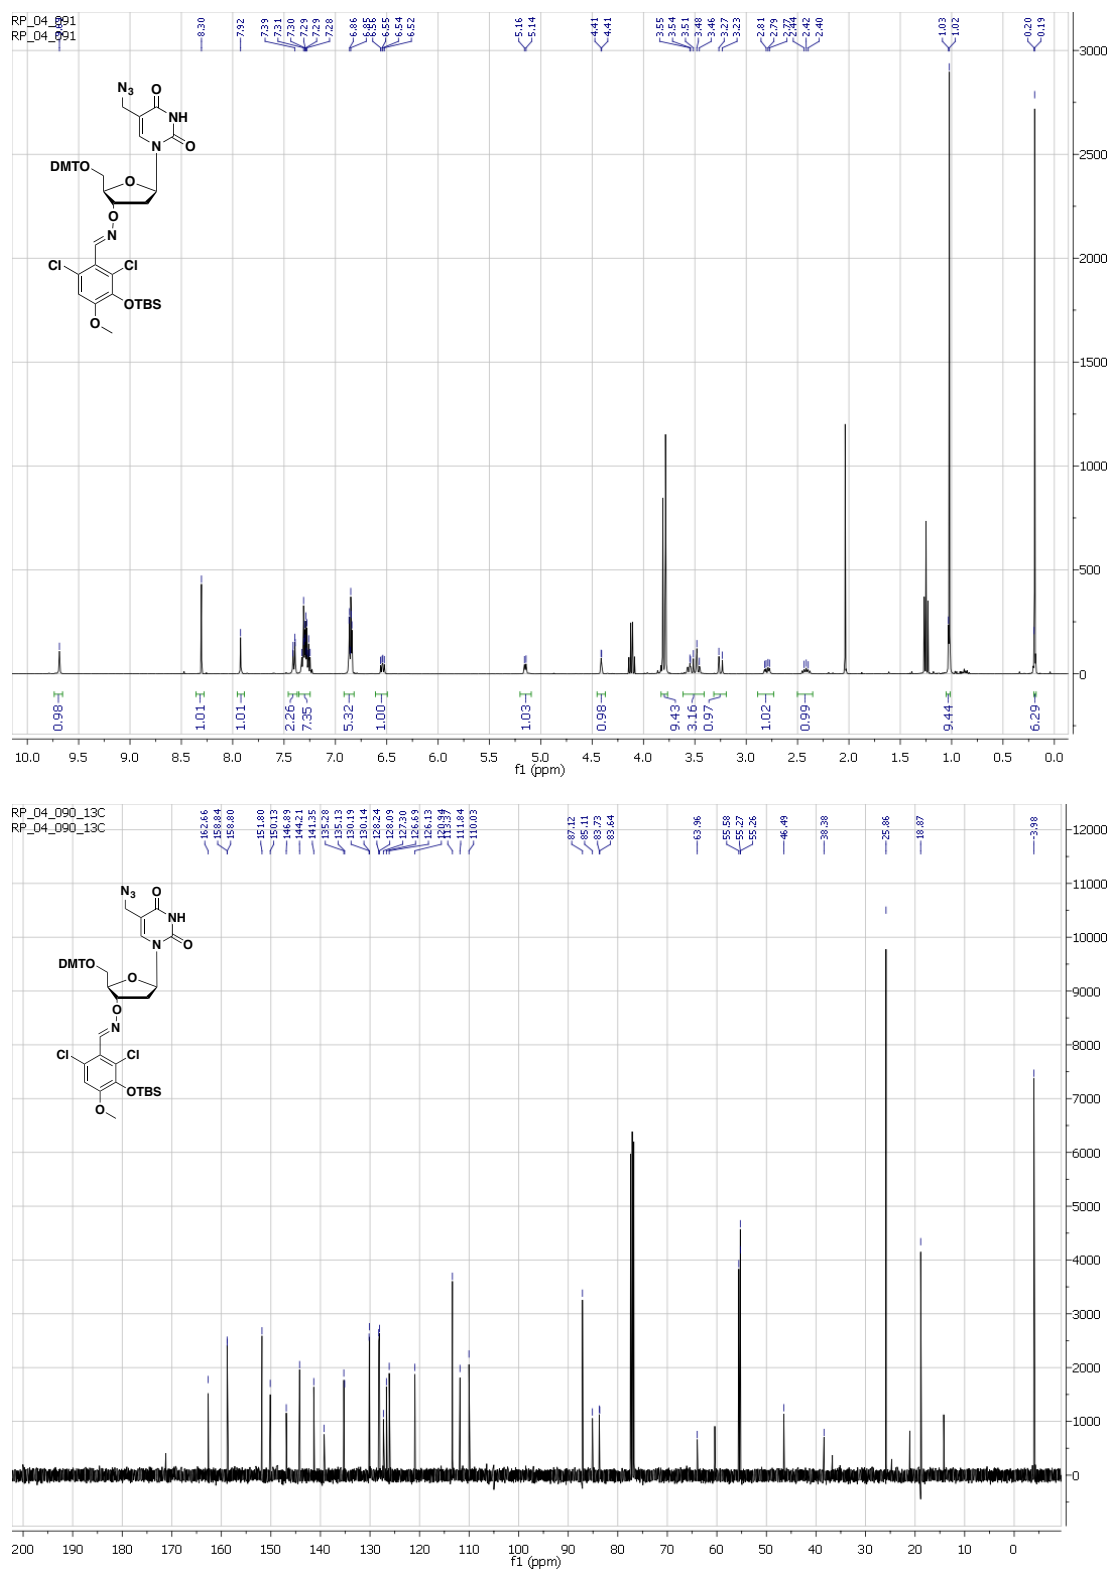

Figure S9.  $^1\text{H}$  and  $^{13}\text{C}$  NMR spectra of 6.



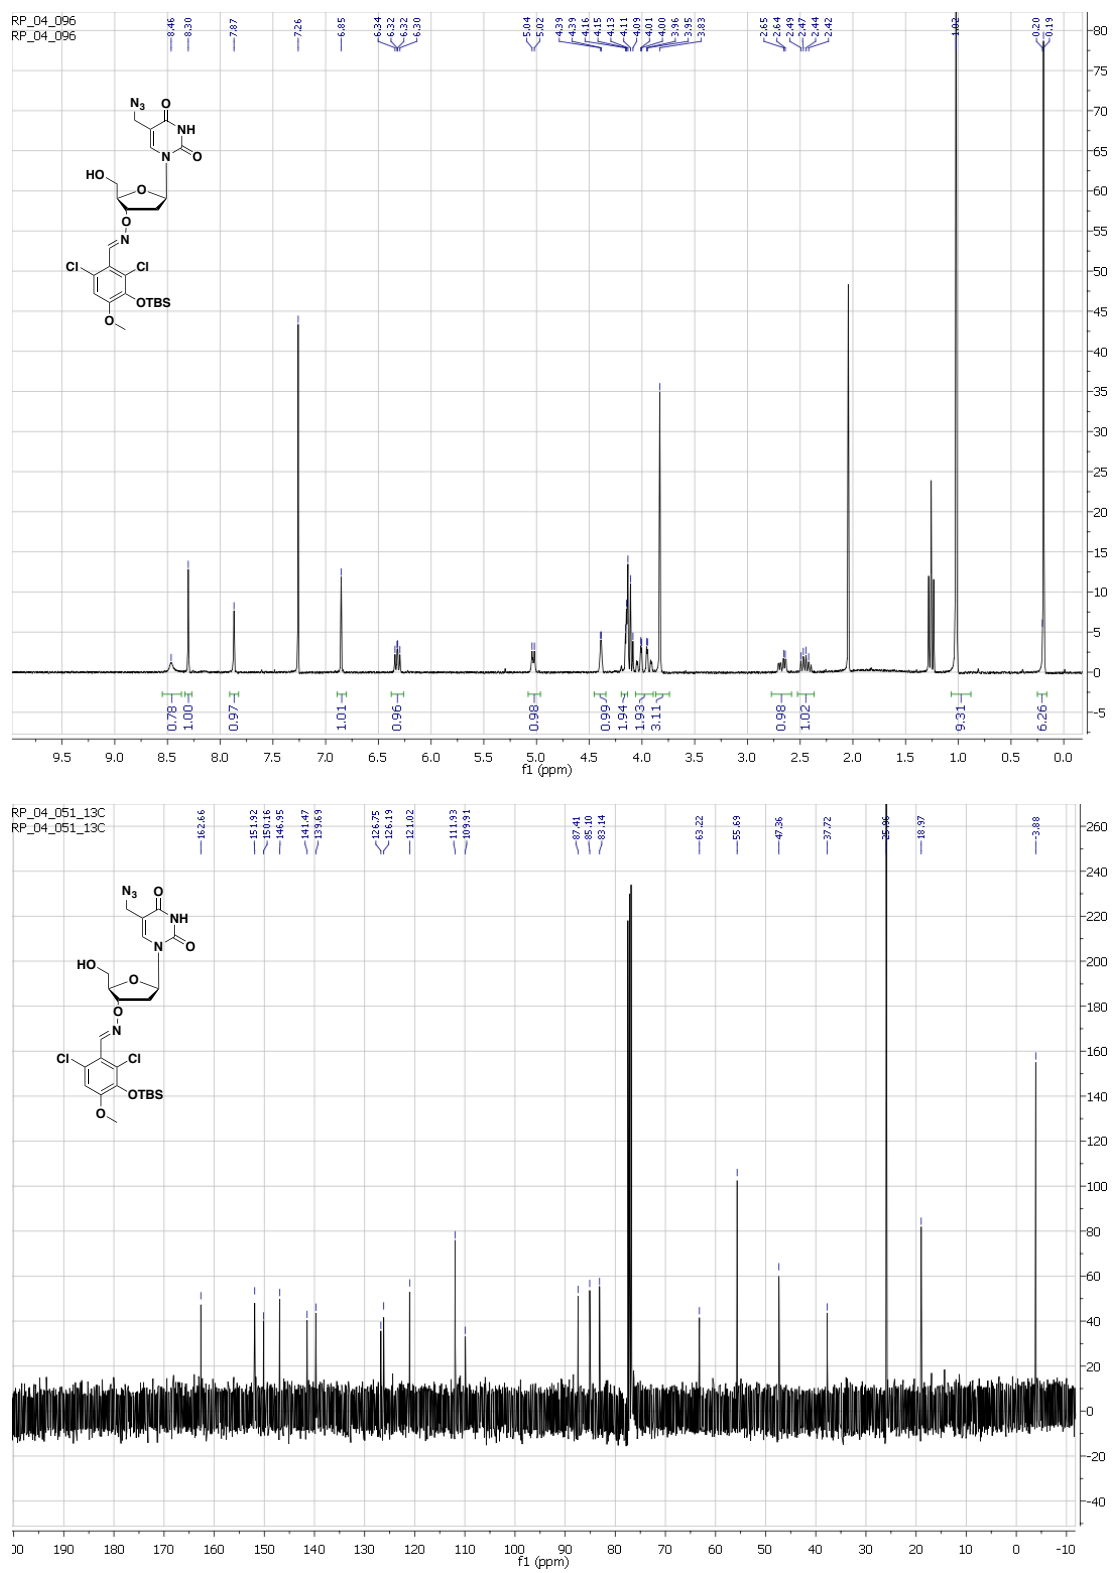

Figure S10. <sup>1</sup>H and <sup>13</sup>C NMR spectra of 7.

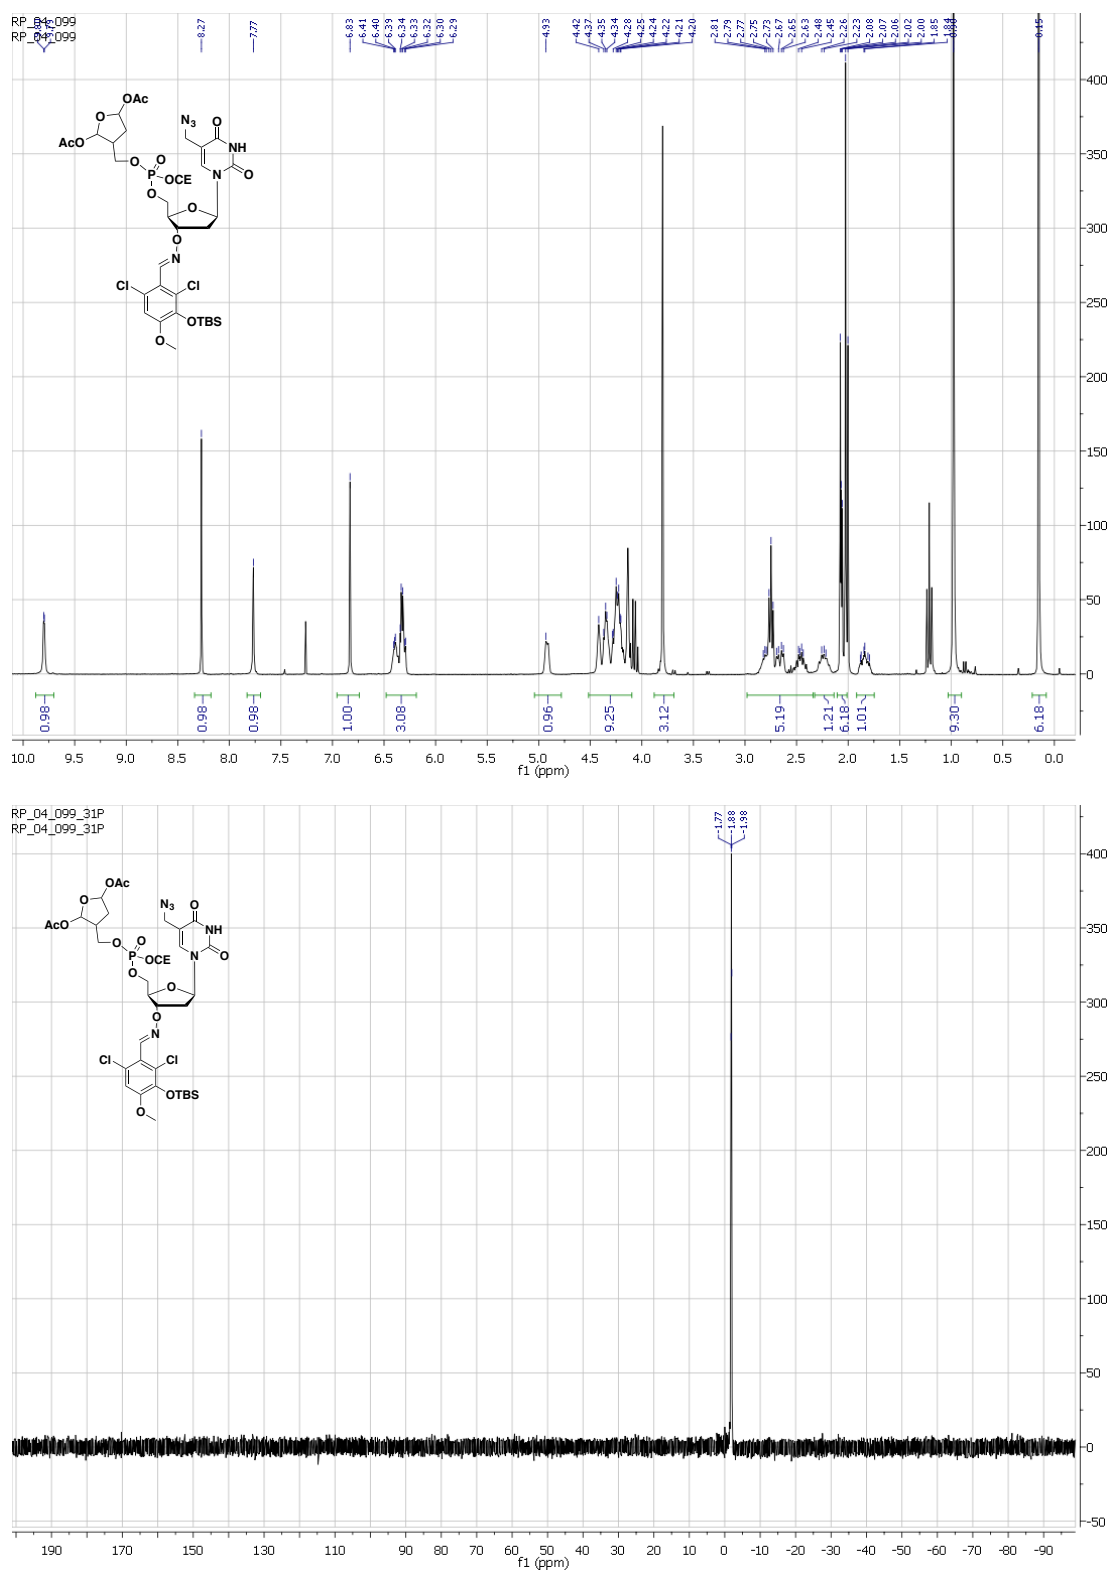

Figure S11.  $^1\text{H}$  and  $^{31}\text{P}$  NMR spectra of TBS-phosphate triester precursor to **12**.

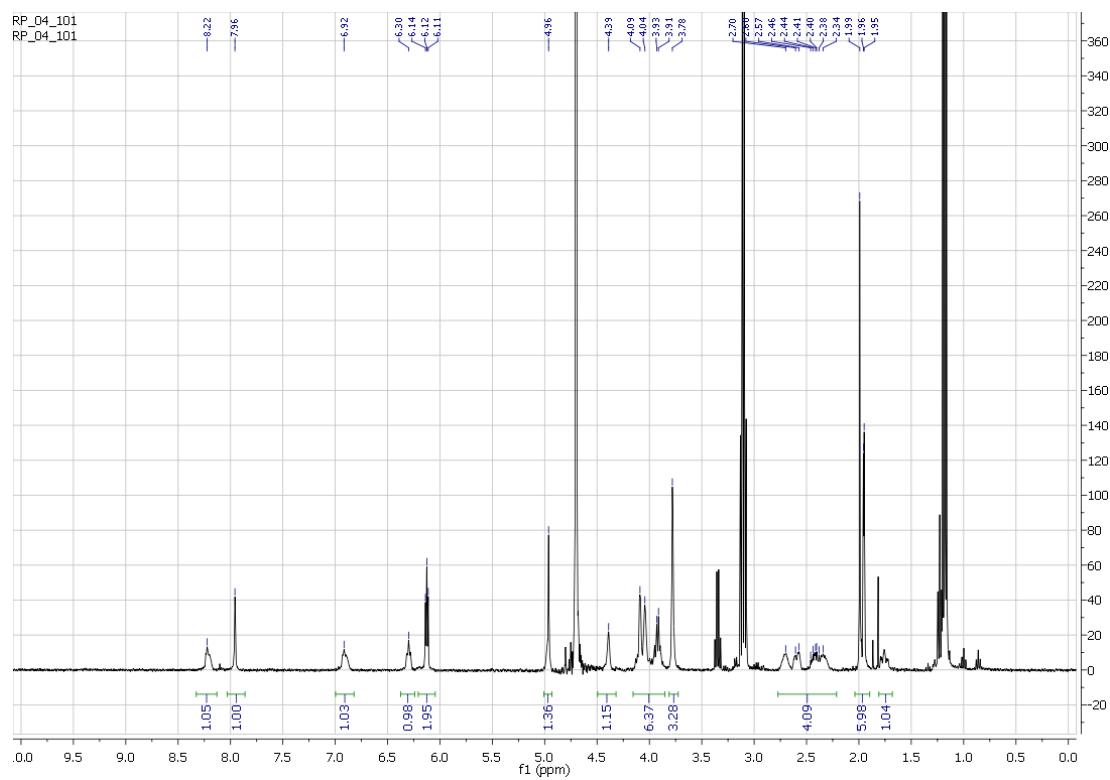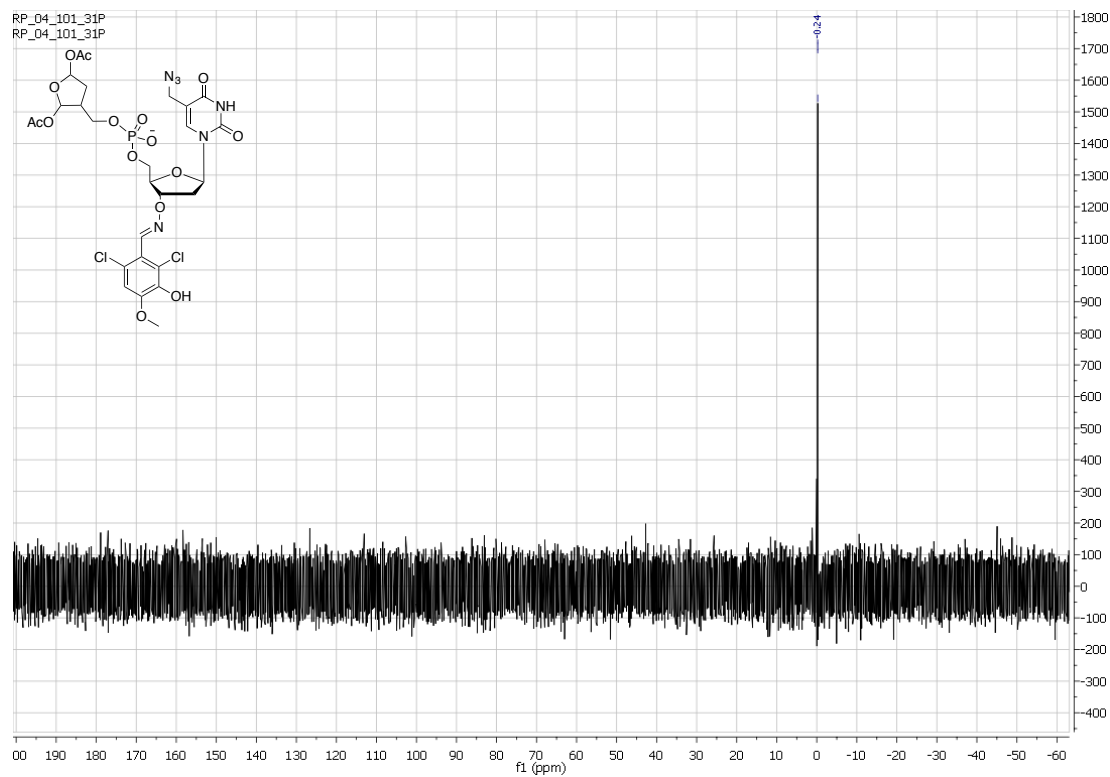

**Figure S12.**  $^1\text{H}$  and  $^{31}\text{P}$  NMR spectra of **12**.

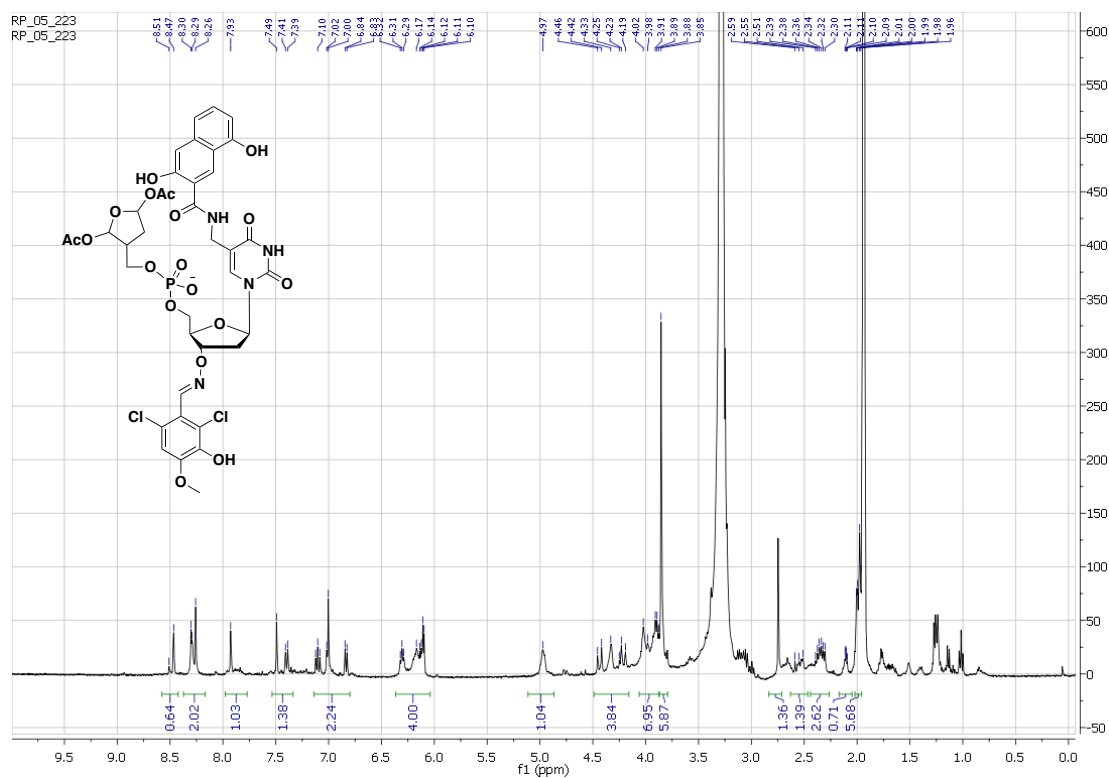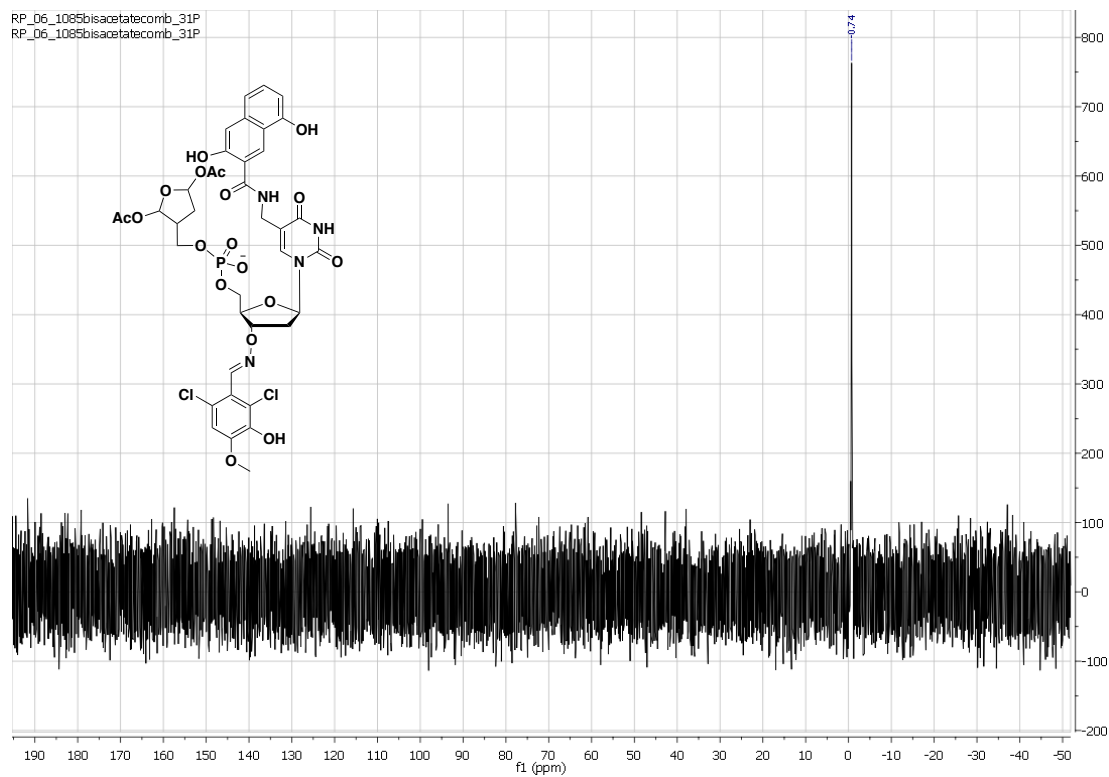

**Figure S13.**  $^1\text{H}$  and  $^{31}\text{P}$  NMR spectra of pro-13.

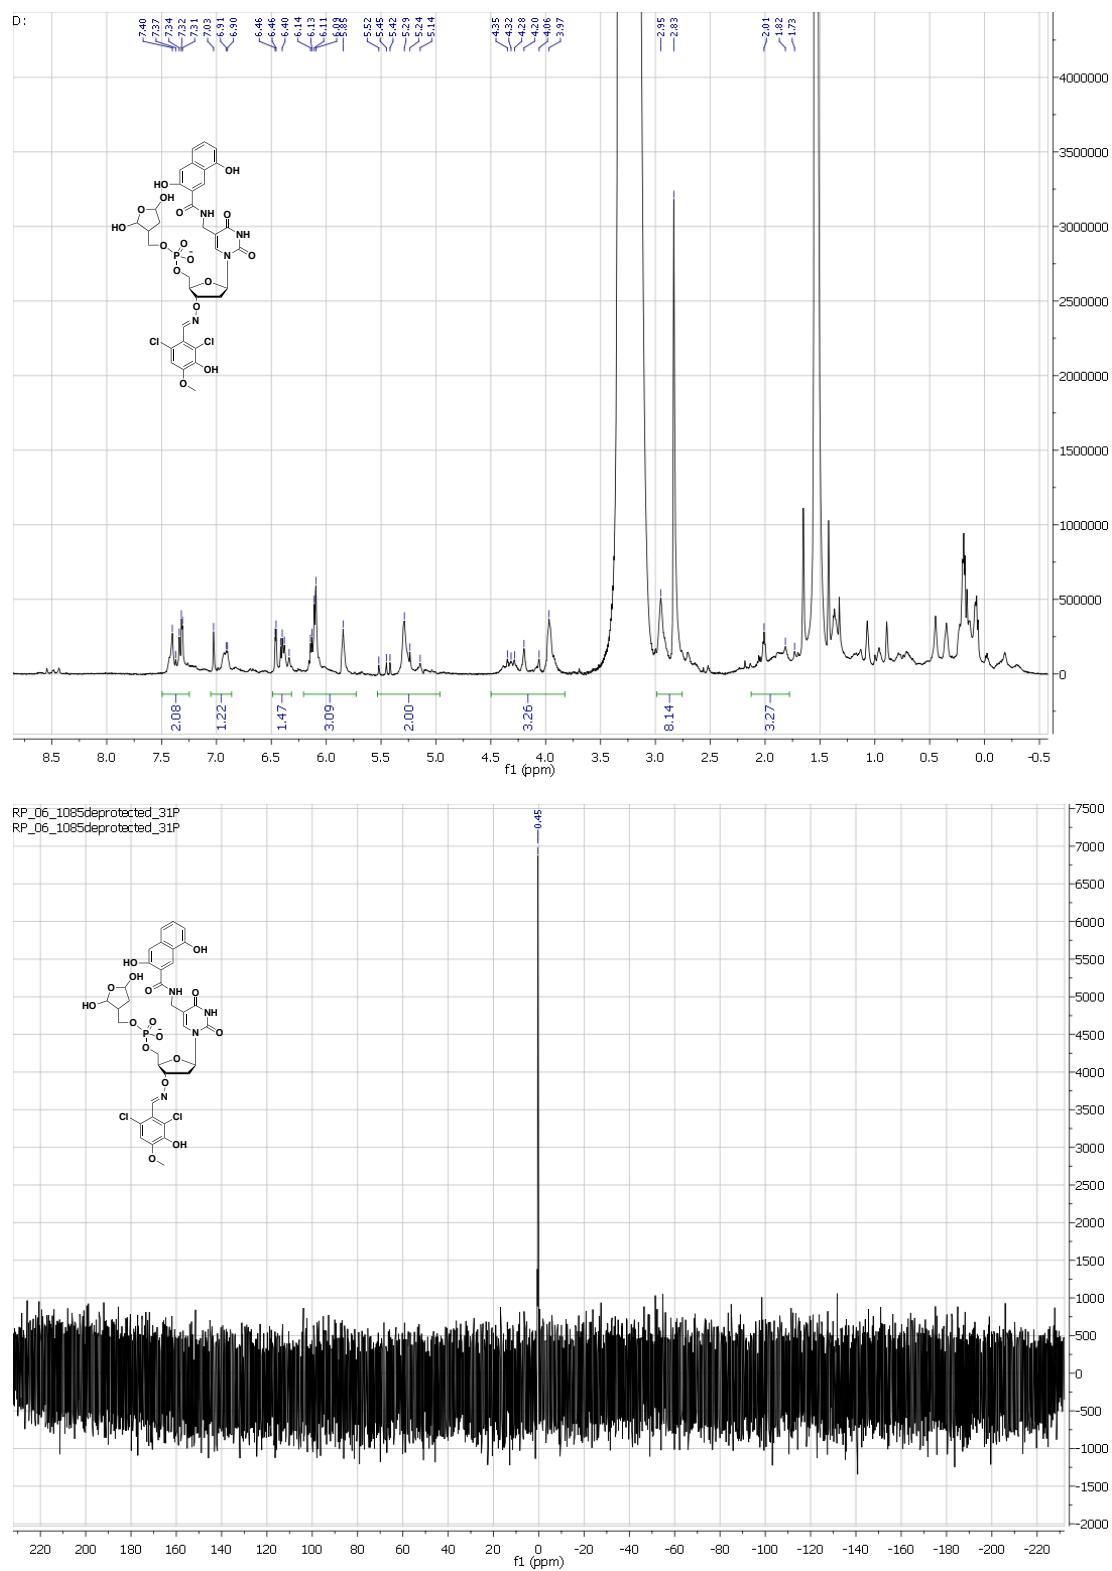

**Figure S14.** <sup>1</sup>H and <sup>31</sup>P NMR spectra of **13**.

1. Chen, F., Gaucher, E. A., Leal, N. A., Hutter, D., Havemann, S. A., Govindarajan, S., Ortlund, E. A., and Benner, S. A. (2010) Reconstructed evolutionary adaptive paths give polymerases accepting reversible terminators for sequencing and SNP detection, *Proc. Natl. Acad. Sci. USA* 107, 1948-1953.
2. Arian, D., Hedayati, M., Zhou, H., Bilis, Z., Chen, K., DeWeese, T. L., and Greenberg, M. M. (2014) Irreversible Inhibition of DNA Polymerase  $\beta$  by Small-Molecule Mimics of a DNA Lesion, *J. Am. Chem. Soc.* 136, 3176-3183.
